# Supplementary material for: SUMO1 modification of KHSRP regulates tumorigenesis by preventing the TL-G-Rich miRNA biogenesis
Source: Springer Nature journal article supplement (doi:10.1186/s12943-017-0724-6), 2017-10-11
Supplement: MOESM6 [file 15127168]

**Additional file 6: Table S1. The transcripts expression extracted from TCGA databank was presented in the normalized FPKM (Fragments Per Kilobase of transcript per Million fragments mapped)**

| id                           | KHSRP      | UBC9       | gleason score |
|------------------------------|------------|------------|---------------|
| TCGA-QU-A6IO-01A-11R-A31N-07 | 3432.11223 | 6350.93846 | 6             |
| TCGA-G9-6347-01A-11R-A31N-07 | 3841.6812  | 7888.5824  | 6             |
| TCGA-J4-A67O-01A-11R-A30B-07 | 4617.95725 | 6751.87243 | 7             |
| TCGA-QU-A6IL-01A-11R-A31N-07 | 4735.78649 | 6620.0982  | 7             |
| TCGA-QU-A6IM-01A-11R-A31N-07 | 5048.61868 | 6947.54804 | 7             |
| TCGA-HC-A632-01A-11R-A29R-07 | 5153.10876 | 7079.38216 | 9             |
| TCGA-G9-6379-01A-11R-A31N-07 | 5293.52886 | 6563.65823 | 7             |
| TCGA-J4-A67N-01A-11R-A30B-07 | 5337.38397 | 6399.89439 | 7             |
| TCGA-J4-A67Q-01A-21R-A30B-07 | 5424.47484 | 7272.58819 | 6             |
| TCGA-J4-A67L-01A-11R-A30B-07 | 5514.01999 | 5983.71617 | 7             |
| TCGA-HC-A48F-01A-11R-A250-07 | 5548.79198 | 6744.32232 | 8             |
| TCGA-EJ-A65M-01A-11R-A29R-07 | 5598.36483 | 5377.0082  | 6             |
| TCGA-EJ-5525-01A-01R-1580-07 | 5612.37297 | 5450.96682 | 9             |
| TCGA-KK-A7AW-01A-11R-A32O-07 | 5647.91535 | 6842.28606 | 7             |
| TCGA-J4-A67M-01A-11R-A30B-07 | 5720.08705 | 6180.34761 | 7             |
| TCGA-HC-A6AP-01A-11R-A30B-07 | 5761.88048 | 5881.20542 | 7             |
| TCGA-EJ-A46F-01A-31R-A250-07 | 5855.05817 | 6539.54227 | 8             |
| TCGA-G9-6498-01A-12R-A311-07 | 5865.79361 | 6520.01969 | 7             |
| TCGA-ZG-A9L9-01A-11R-A41O-07 | 5915.42711 | 7546.15749 | 9             |
| TCGA-QU-A6IN-01A-11R-A31N-07 | 5938.45157 | 8105.92229 | 7             |
| TCGA-KK-A6E4-01A-11R-A30B-07 | 5976.0856  | 7372.15567 | 7             |
| TCGA-HC-A6AN-01A-11R-A30B-07 | 5983.83513 | 5877.80217 | 7             |
| TCGA-M7-A723-01A-12R-A32O-07 | 6115.44487 | 5795.24719 | 7             |
| TCGA-HC-A6AS-01A-11R-A30B-07 | 6155.05144 | 6277.75333 | 7             |
| TCGA-HC-A6AQ-01A-11R-A30B-07 | 6168.68801 | 6281.7824  | 7             |
| TCGA-EJ-7312-01B-21R-A32O-07 | 6169.72206 | 5635.40851 | 7             |
| TCGA-EJ-A65B-01A-12R-A30B-07 | 6172.25805 | 5778.43237 | 9             |
| TCGA-J4-A67K-01A-21R-A30B-07 | 6189.15844 | 6743.6419  | 7             |
| TCGA-J4-A67R-01A-21R-A30B-07 | 6202.67567 | 6513.46197 | 7             |
| TCGA-KK-A7B0-01A-11R-A32O-07 | 6215.93121 | 6764.03935 | 9             |
| TCGA-KK-A7AY-01A-11R-A33R-07 | 6231.64126 | 6317.93491 | 7             |
| TCGA-KK-A6E7-01A-11R-A31N-07 | 6236.82755 | 4865.57905 | 9             |
| TCGA-KK-A59V-01A-11R-A29R-07 | 6278.44661 | 6726.98992 | 9             |
| TCGA-EJ-7325-01B-11R-A32O-07 | 6306.18199 | 7831.0474  | 7             |
| TCGA-FC-A66V-01A-21R-A30B-07 | 6315.34668 | 5914.49969 | 7             |
| TCGA-FC-A6HD-01A-11R-A31N-07 | 6322.34873 | 5166.80955 | 7             |
| TCGA-V1-A8MF-01A-11R-A36G-07 | 6329.01727 | 5103.70405 | 6             |
| TCGA-MG-AAMC-01A-11R-A41O-07 | 6353.62061 | 6055.81929 | 9             |
| TCGA-M7-A722-01A-12R-A36G-07 | 6422.76786 | 5996.79931 | 8             |
| TCGA-KK-A6E5-01A-11R-A311-07 | 6432.97855 | 5548.49567 | 7             |
| TCGA-EJ-5521-01A-01R-1580-07 | 6435.93147 | 6110.95144 | 7             |
| TCGA-VP-A872-01A-11R-A352-07 | 6483.51393 | 7369.68019 | 8             |
| TCGA-G9-7521-01A-11R-2263-07 | 6488.57542 | 5336.63673 | 8             |
| TCGA-H9-A6BY-01A-11R-A30B-07 | 6543.41379 | 6632.29047 | 7             |
| TCGA-EJ-8472-01A-11R-2403-07 | 6599.77618 | 6333.60803 | 8             |

|                              |            |            |   |
|------------------------------|------------|------------|---|
| TCGA-EJ-5516-01A-01R-1580-07 | 6640.52677 | 5041.4027  | 7 |
| TCGA-G9-6373-01A-11R-1789-07 | 6643.37833 | 6877.84616 | 7 |
| TCGA-X4-A8KQ-01A-12R-A36G-07 | 6713.46687 | 5626.77134 | 9 |
| TCGA-HC-A6AO-01A-11R-A30B-07 | 6717.3128  | 5514.24022 | 7 |
| TCGA-J9-A52B-01A-11R-A26U-07 | 6895.49149 | 6399.72816 | 9 |
| TCGA-HC-A6AL-01A-11R-A30B-07 | 6897.03716 | 6001.36176 | 7 |
| TCGA-EJ-AB20-01A-12R-A41O-07 | 6946.31808 | 7383.90947 | 6 |
| TCGA-J9-A52E-01A-11R-A26U-07 | 6980.51707 | 7109.42378 | 9 |
| TCGA-X4-A8KS-01A-12R-A36G-07 | 7054.8948  | 6094.99441 | 7 |
| TCGA-G9-7525-01A-31R-2263-07 | 7063.83955 | 5602.8514  | 7 |
| TCGA-G9-6354-01A-11R-A311-07 | 7067.93898 | 5363.87835 | 7 |
| TCGA-EJ-8469-01A-11R-2403-07 | 7093.6185  | 6801.04251 | 9 |
| TCGA-M7-A71Z-01A-12R-A32O-07 | 7106.61968 | 6638.34557 | 7 |
| TCGA-J9-A52C-01A-11R-A26U-07 | 7119.4765  | 5531.38309 | 9 |
| TCGA-KK-A8IF-01A-11R-A36G-07 | 7166.03722 | 7263.7115  | 7 |
| TCGA-VP-A875-01A-31R-A352-07 | 7170.13723 | 7701.15249 | 7 |
| TCGA-EJ-5515-01A-01R-1580-07 | 7187.3599  | 4480.81014 | 7 |
| TCGA-ZG-A9LM-01A-11R-A41O-07 | 7203.35658 | 5468.59413 | 9 |
| TCGA-HC-A631-01A-11R-A29R-07 | 7214.08568 | 5889.84184 | 9 |
| TCGA-KK-A7B4-01A-11R-A32O-07 | 7224.53944 | 7054.74051 | 9 |
| TCGA-HC-A6HY-01A-11R-A31N-07 | 7296.2003  | 6123.45236 | 7 |
| TCGA-EJ-A65D-01A-11R-A30B-07 | 7312.69576 | 6703.66938 | 8 |
| TCGA-V1-A9OT-01A-11R-A41O-07 | 7335.33629 | 7601.02542 | 6 |
| TCGA-ZG-A9NI-01A-11R-A41O-07 | 7375.35373 | 5954.21833 | 9 |
| TCGA-EJ-5507-01A-01R-1580-07 | 7375.69376 | 4664.82349 | 9 |
| TCGA-V1-A9Z8-01A-11R-A41O-07 | 7381.86199 | 4964.63877 | 9 |
| TCGA-ZG-A9LU-01A-11R-A41O-07 | 7429.96122 | 5757.13555 | 9 |
| TCGA-FC-A5OB-01A-11R-A29R-07 | 7432.89919 | 3013.58214 | 9 |
| TCGA-HC-A9TE-01A-11R-A41O-07 | 7461.53401 | 6145.06752 | 9 |
| TCGA-HC-7817-01B-11R-A29R-07 | 7473.73626 | 5982.47506 | 7 |
| TCGA-ZG-A8QZ-01A-11R-A37L-07 | 7515.46017 | 6148.28082 | 9 |
| TCGA-HC-A8CY-01A-11R-A36G-07 | 7525.89567 | 7682.73702 | 9 |
| TCGA-KK-A59X-01A-11R-A29R-07 | 7544.9387  | 4801.23551 | 9 |
| TCGA-XK-AAK1-01A-11R-A41O-07 | 7595.76734 | 5210.15596 | 7 |
| TCGA-EJ-5512-01A-01R-1580-07 | 7600.19029 | 5426.00868 | 7 |
| TCGA-ZG-A9N3-01A-11R-A41O-07 | 7622.96458 | 6245.67829 | 9 |
| TCGA-ZG-A9LS-01A-12R-A41O-07 | 7661.68993 | 5761.90796 | 9 |
| TCGA-G9-7519-01A-11R-2263-07 | 7670.49265 | 4675.60061 | 7 |
| TCGA-J9-A52D-01A-11R-A29R-07 | 7679.5958  | 5065.73457 | 9 |
| TCGA-KK-A6E8-01A-11R-A31N-07 | 7718.68328 | 5313.42287 | 9 |
| TCGA-HC-8262-01A-11R-2263-07 | 7738.31583 | 6175.00859 | 8 |
| TCGA-YL-A8SO-01B-31R-A37L-07 | 7739.26406 | 8120.71249 | 9 |
| TCGA-EJ-A65G-01A-21R-A29R-07 | 7745.72352 | 4864.48092 | 8 |
| TCGA-ZG-A8QX-01A-11R-A37L-07 | 7750.54907 | 5433.70819 | 6 |
| TCGA-FC-7961-01A-11R-A29R-07 | 7802.85867 | 5034.56655 | 9 |
| TCGA-CH-5741-01A-11R-1580-07 | 7813.83999 | 4957.6024  | 9 |
| TCGA-V1-A8WW-01A-11R-A37L-07 | 7816.6615  | 5841.25297 | 9 |
| TCGA-EJ-5542-01A-01R-1580-07 | 7828.15286 | 5902.1199  | 7 |
| TCGA-ZG-A9M4-01A-11R-A41O-07 | 7831.72339 | 6916.2973  | 9 |
| TCGA-HC-8216-01A-11R-A29R-07 | 7844.04495 | 5357.78615 | 7 |
| TCGA-ZG-A9L0-01A-11R-A41O-07 | 7887.22198 | 5966.95275 | 9 |

|                              |            |            |    |
|------------------------------|------------|------------|----|
| TCGA-ZG-A9LZ-01A-11R-A41O-07 | 7898.24112 | 6110.9062  | 9  |
| TCGA-EJ-7318-01B-11R-A32O-07 | 7899.04751 | 5995.35393 | 7  |
| TCGA-EJ-8474-01A-11R-2403-07 | 7900.10528 | 5785.67366 | 8  |
| TCGA-G9-7523-01A-11R-2263-07 | 7912.1064  | 5631.52892 | 10 |
| TCGA-EJ-A8FO-01A-21R-A36G-07 | 7924.02265 | 5323.28521 | 7  |
| TCGA-YL-A8HM-01A-11R-A36G-07 | 7924.14457 | 5451.65021 | 9  |
| TCGA-KK-A8I4-01A-11R-A36G-07 | 7932.4284  | 7490.74045 | 7  |
| TCGA-EJ-5499-01A-01R-1580-07 | 7939.48666 | 5546.56911 | 7  |
| TCGA-G9-6366-01A-11R-2118-07 | 7941.8376  | 5495.08599 | 7  |
| TCGA-HC-8213-01A-11R-A29R-07 | 7944.1548  | 5212.25435 | 6  |
| TCGA-CH-5788-01A-11R-1580-07 | 7947.17033 | 5986.22551 | 7  |
| TCGA-KK-A8I7-01A-21R-A36G-07 | 8001.7524  | 6124.73444 | 9  |
| TCGA-G9-6332-01A-11R-1789-07 | 8014.34446 | 5010.11419 | 7  |
| TCGA-EJ-5526-01A-01R-1580-07 | 8014.57407 | 4319.96422 | 8  |
| TCGA-M7-A71Y-01A-22R-A32O-07 | 8017.38726 | 6087.99956 | 7  |
| TCGA-VN-A88L-01A-11R-A352-07 | 8021.86212 | 5721.81041 | 7  |
| TCGA-KK-A5A1-01A-11R-A29R-07 | 8065.92827 | 5233.99255 | 9  |
| TCGA-G9-6339-01A-12R-A311-07 | 8093.39787 | 5216.98243 | 7  |
| TCGA-HC-7232-01A-11R-2118-07 | 8102.12809 | 5990.41253 | 9  |
| TCGA-G9-6362-01A-11R-1789-07 | 8107.13499 | 5081.71912 | 7  |
| TCGA-J9-A8CK-01A-11R-A352-07 | 8112.78147 | 6120.26994 | 9  |
| TCGA-J4-8200-01A-11R-A29R-07 | 8126.90931 | 4564.14566 | 7  |
| TCGA-ZG-A9L6-01A-11R-A41O-07 | 8132.45996 | 5270.19147 | 9  |
| TCGA-EJ-5517-01A-01R-1580-07 | 8136.00265 | 4670.85153 | 6  |
| TCGA-VP-AA1N-01A-31R-A41O-07 | 8139.42953 | 4936.59516 | 9  |
| TCGA-KK-A6E0-01A-11R-A311-07 | 8158.50449 | 4007.54076 | 9  |
| TCGA-G9-6343-01A-21R-1965-07 | 8168.2134  | 5351.7233  | 7  |
| TCGA-ZG-A9MC-01A-31R-A41O-07 | 8170.84646 | 6711.65955 | 9  |
| TCGA-G9-A9S0-01A-11R-A41O-07 | 8171.96221 | 5109.28659 | 8  |
| TCGA-EJ-5504-01A-01R-1580-07 | 8177.91079 | 4930.82059 | 7  |
| TCGA-XJ-A83F-01A-11R-A352-07 | 8182.65544 | 5429.97658 | 7  |
| TCGA-EJ-8468-01A-21R-2403-07 | 8184.55423 | 4773.13896 | 8  |
| TCGA-CH-5737-01A-11R-1580-07 | 8200.60377 | 4565.80358 | 7  |
| TCGA-KK-A8IC-01A-11R-A36G-07 | 8204.16531 | 5159.33735 | 9  |
| TCGA-EJ-A7NF-01A-11R-A33R-07 | 8206.53215 | 5980.12766 | 7  |
| TCGA-XK-AAJT-01A-11R-A41O-07 | 8207.28989 | 6214.69507 | 7  |
| TCGA-2A-A8VL-01A-21R-A37L-07 | 8225.75353 | 4798.1579  | 6  |
| TCGA-EJ-5505-01A-01R-1580-07 | 8245.92803 | 4474.68325 | 7  |
| TCGA-G9-6361-01A-21R-1965-07 | 8250.48109 | 6191.41612 | 7  |
| TCGA-J4-AATV-01A-11R-A41O-07 | 8270.18867 | 5965.0159  | 6  |
| TCGA-XK-AAIR-01A-11R-A41O-07 | 8282.22802 | 5043.14208 | 8  |
| TCGA-G9-6336-01A-11R-1789-07 | 8284.28787 | 5126.88207 | 7  |
| TCGA-KK-A8IB-01A-11R-A36G-07 | 8296.10164 | 5758.48306 | 9  |
| TCGA-ZG-A9L4-01A-11R-A41O-07 | 8302.50495 | 5437.26737 | 9  |
| TCGA-G9-6351-01A-21R-1965-07 | 8304.43528 | 4838.75331 | 7  |
| TCGA-V1-A9OX-01A-11R-A41O-07 | 8308.18621 | 4996.25308 | 8  |
| TCGA-4L-AA1F-01A-11R-A41O-07 | 8308.76796 | 5044.07421 | 8  |
| TCGA-J9-A8CP-01A-11R-A352-07 | 8316.10057 | 5332.85102 | 7  |
| TCGA-TK-A8OK-01A-22R-A36G-07 | 8316.34865 | 6270.69091 | 7  |
| TCGA-EJ-5514-01A-01R-1580-07 | 8337.30602 | 4128.63551 | 9  |
| TCGA-YL-A9WY-01A-11R-A41O-07 | 8344.45513 | 5860.70699 | 9  |

|                              |            |            |   |
|------------------------------|------------|------------|---|
| TCGA-V1-A8MK-01A-11R-A36G-07 | 8344.95391 | 4922.31489 | 6 |
| TCGA-XJ-A9DK-01A-11R-A37L-07 | 8355.77328 | 5702.79444 | 8 |
| TCGA-VN-A88K-01A-11R-A352-07 | 8356.79495 | 5465.43352 | 8 |
| TCGA-KK-A8IA-01A-11R-A36G-07 | 8388.53335 | 5735.09736 | 9 |
| TCGA-YL-A8SI-01A-11R-A41O-07 | 8390.49171 | 4818.57818 | 9 |
| TCGA-TP-A8TT-01A-12R-A41O-07 | 8391.58068 | 4725.53403 | 7 |
| TCGA-KK-A6E6-01A-11R-A311-07 | 8400.72518 | 3973.48996 | 9 |
| TCGA-V1-A9ZI-01A-11R-A41O-07 | 8416.53129 | 6195.68748 | 9 |
| TCGA-ZG-A8QW-01A-11R-A37L-07 | 8447.4504  | 5147.55744 | 9 |
| TCGA-KK-A59Y-01A-11R-A26U-07 | 8448.46242 | 5213.2472  | 9 |
| TCGA-J4-A6G1-01A-11R-A311-07 | 8453.19819 | 5940.433   | 8 |
| TCGA-XJ-A83G-01A-11R-A352-07 | 8459.75603 | 4890.46864 | 7 |
| TCGA-XJ-A9DQ-01A-11R-A37L-07 | 8469.00952 | 5314.67193 | 6 |
| TCGA-ZG-A9L2-01A-31R-A41O-07 | 8469.25234 | 5733.42932 | 9 |
| TCGA-ZG-A9L1-01A-11R-A41O-07 | 8473.72248 | 6020.503   | 9 |
| TCGA-VN-A88I-01A-11R-A352-07 | 8477.50817 | 6276.14878 | 8 |
| TCGA-G9-6499-01A-12R-1965-07 | 8479.5238  | 4509.3023  | 9 |
| TCGA-CH-5743-01A-21R-1580-07 | 8488.75083 | 5643.84175 | 7 |
| TCGA-V1-A9OA-01A-11R-A41O-07 | 8491.93498 | 6483.65656 | 9 |
| TCGA-XK-AAJU-01A-11R-A41O-07 | 8508.49369 | 5263.51822 | 7 |
| TCGA-KK-A7AV-01A-11R-A32O-07 | 8510.94042 | 5256.71568 | 7 |
| TCGA-M7-A720-01A-12R-A32O-07 | 8524.79264 | 5276.33062 | 6 |
| TCGA-EJ-A65E-01A-11R-A29R-07 | 8524.8837  | 4208.94982 | 7 |
| TCGA-EJ-A46E-01A-31R-A250-07 | 8527.25461 | 6102.03249 | 8 |
| TCGA-G9-6338-01A-12R-1965-07 | 8528.14438 | 4912.72044 | 7 |
| TCGA-KK-A8IH-01A-11R-A36G-07 | 8528.37931 | 5254.98967 | 7 |
| TCGA-EJ-5524-01A-01R-1580-07 | 8529.67144 | 5129.88998 | 9 |
| TCGA-V1-A9O7-01A-21R-A41O-07 | 8534.57837 | 6070.47077 | 9 |
| TCGA-G9-6385-01A-11R-1789-07 | 8536.27238 | 4801.90564 | 7 |
| TCGA-HC-A8D0-01A-11R-A36G-07 | 8541.39611 | 5922.41415 | 7 |
| TCGA-CH-5789-01A-11R-1580-07 | 8542.98134 | 4816.27648 | 7 |
| TCGA-G9-6329-01A-13R-1965-07 | 8545.15725 | 5503.0235  | 7 |
| TCGA-ZG-A8QY-01A-11R-A37L-07 | 8550.27301 | 5128.44969 | 9 |
| TCGA-G9-7522-01A-11R-2263-07 | 8555.4801  | 4396.32212 | 7 |
| TCGA-EJ-A46B-01A-31R-A250-07 | 8566.35721 | 4566.37801 | 8 |
| TCGA-EJ-5522-01A-01R-1580-07 | 8568.67507 | 4895.55019 | 7 |
| TCGA-2A-A8VO-01A-11R-A37L-07 | 8571.27653 | 4676.18604 | 6 |
| TCGA-CH-5772-01A-11R-1580-07 | 8573.07077 | 3501.22777 | 9 |
| TCGA-EJ-A8FP-01A-21R-A36G-07 | 8579.10006 | 5225.05531 | 8 |
| TCGA-CH-5740-01A-11R-1580-07 | 8580.15733 | 5191.84701 | 7 |
| TCGA-EJ-A6RC-01A-11R-A32O-07 | 8582.9807  | 5605.69797 | 7 |
| TCGA-KC-A4BR-01A-32R-A32Y-07 | 8596.90512 | 5828.0966  | 9 |
| TCGA-G9-A9S4-01A-11R-A41O-07 | 8603.65963 | 6505.52743 | 8 |
| TCGA-YL-A8HO-01A-11R-A36G-07 | 8610.32217 | 5234.26216 | 7 |
| TCGA-HC-8264-01B-11R-2403-07 | 8612.22712 | 4308.39383 | 9 |
| TCGA-VN-A88R-01A-11R-A36G-07 | 8614.94737 | 4262.47876 | 8 |
| TCGA-KK-A6E1-01A-11R-A311-07 | 8617.22154 | 4562.5813  | 9 |
| TCGA-2A-A8VV-01A-11R-A37L-07 | 8620.74779 | 5464.30299 | 6 |
| TCGA-EJ-5498-01A-01R-1580-07 | 8624.62908 | 5585.23634 | 7 |
| TCGA-KK-A8IG-01A-11R-A36G-07 | 8626.26892 | 4978.43195 | 7 |
| TCGA-G9-A9S7-01A-11R-A41O-07 | 8629.92079 | 4617.22528 | 8 |

|                              |            |            |   |
|------------------------------|------------|------------|---|
| TCGA-EJ-A7NG-01A-31R-A33R-07 | 8637.44745 | 5310.77936 | 7 |
| TCGA-KC-A7FE-01A-12R-A33R-07 | 8650.51663 | 5128.83344 | 7 |
| TCGA-CH-5790-01A-11R-1580-07 | 8655.29908 | 4836.94316 | 7 |
| TCGA-KK-A8I6-01A-11R-A36G-07 | 8656.39347 | 5497.95732 | 7 |
| TCGA-KC-A7FA-01A-21R-A33R-07 | 8661.06669 | 5614.13195 | 7 |
| TCGA-G9-7510-01A-11R-2263-07 | 8661.93914 | 4586.3377  | 8 |
| TCGA-EJ-A65J-01A-11R-A311-07 | 8661.98559 | 4358.38882 | 9 |
| TCGA-V1-A9Z9-01A-21R-A41O-07 | 8676.33101 | 4460.70317 | 9 |
| TCGA-V1-A8MG-01A-11R-A36G-07 | 8679.97604 | 5348.23686 | 7 |
| TCGA-KC-A7F3-01A-21R-A33R-07 | 8688.80976 | 5210.4241  | 7 |
| TCGA-Y6-A8TL-01A-21R-A37L-07 | 8701.33905 | 4514.50585 | 6 |
| TCGA-EJ-5506-01A-01R-1580-07 | 8703.54851 | 4815.14679 | 8 |
| TCGA-G9-6370-01A-11R-1789-07 | 8707.04046 | 5026.81638 | 7 |
| TCGA-EJ-5496-01A-01R-1580-07 | 8710.73292 | 4556.84899 | 7 |
| TCGA-G9-7509-01A-11R-A41O-07 | 8713.70531 | 5338.73239 | 6 |
| TCGA-HC-7747-01A-11R-2118-07 | 8718.13682 | 5075.00241 | 7 |
| TCGA-V1-A9ZR-01A-11R-A41O-07 | 8721.24058 | 5551.73846 | 8 |
| TCGA-G9-6367-01A-11R-1789-07 | 8723.52748 | 4591.66713 | 9 |
| TCGA-YL-A8SQ-01B-11R-A37L-07 | 8726.75753 | 4793.54163 | 9 |
| TCGA-G9-6378-01A-11R-1789-07 | 8731.83675 | 4457.12853 | 7 |
| TCGA-J4-A6M7-01A-11R-A31N-07 | 8742.51956 | 5505.47629 | 7 |
| TCGA-G9-6356-01A-11R-1789-07 | 8746.06793 | 5427.72154 | 9 |
| TCGA-G9-6364-01A-21R-1789-07 | 8746.64247 | 5215.13478 | 7 |
| TCGA-EJ-A7NK-01A-12R-A352-07 | 8749.69664 | 5223.81977 | 7 |
| TCGA-YL-A9WH-01A-11R-A37L-07 | 8755.16775 | 6345.76203 | 9 |
| TCGA-FC-A8O0-01A-41R-A37L-07 | 8760.48923 | 5611.90001 | 6 |
| TCGA-V1-A9OH-01A-11R-A41O-07 | 8761.43539 | 5173.86554 | 8 |
| TCGA-HC-8257-01A-11R-2263-07 | 8762.00113 | 4657.88458 | 7 |
| TCGA-M7-A724-01A-12R-A32O-07 | 8768.22295 | 4962.56764 | 8 |
| TCGA-HI-7171-01A-12R-2118-07 | 8770.39239 | 5755.98748 | 9 |
| TCGA-HI-7168-01A-11R-2118-07 | 8773.77193 | 5831.4797  | 9 |
| TCGA-V1-A8MM-01A-11R-A37L-07 | 8775.61061 | 5626.01296 | 7 |
| TCGA-VP-A878-01A-31R-A352-07 | 8775.98557 | 4828.09434 | 9 |
| TCGA-HC-8261-01A-11R-2263-07 | 8776.01153 | 4044.88308 | 7 |
| TCGA-CH-5765-01A-11R-1580-07 | 8776.85391 | 4778.15679 | 7 |
| TCGA-KC-A7F5-01A-11R-A33R-07 | 8788.03503 | 5989.20948 | 7 |
| TCGA-KK-A7B3-01A-11R-A33R-07 | 8792.70846 | 5585.66814 | 9 |
| TCGA-HC-A8D1-01A-11R-A36G-07 | 8793.39095 | 5314.35204 | 7 |
| TCGA-CH-5762-01A-11R-1580-07 | 8797.90059 | 5031.59184 | 7 |
| TCGA-2A-AAYO-01A-11R-A41O-07 | 8798.19631 | 4592.57537 | 6 |
| TCGA-XA-A8JR-01A-11R-A36G-07 | 8803.51078 | 4529.27861 | 7 |
| TCGA-CH-5791-01A-11R-1580-07 | 8807.00161 | 4723.21648 | 7 |
| TCGA-XK-AAJR-01A-11R-A41O-07 | 8808.98976 | 4581.39543 | 7 |
| TCGA-YL-A8SK-01B-21R-A37L-07 | 8813.52856 | 5850.55006 | 9 |
| TCGA-EJ-A46D-01A-21R-A32Y-07 | 8820.60427 | 5006.37991 | 8 |
| TCGA-ZG-A9ND-01A-11R-A41O-07 | 8827.37829 | 4208.84494 | 9 |
| TCGA-XJ-A9DI-01A-11R-A37L-07 | 8828.92435 | 5660.55082 | 9 |
| TCGA-ZG-A9LY-01A-11R-A41O-07 | 8833.8177  | 4858.1341  | 9 |
| TCGA-EJ-AB27-01A-11R-A41O-07 | 8836.28014 | 4970.33407 | 6 |
| TCGA-CH-5739-01A-11R-1580-07 | 8836.76468 | 5836.84011 | 7 |
| TCGA-VP-A87J-01A-11R-A352-07 | 8841.21542 | 5119.69136 | 7 |

|                              |            |            |    |
|------------------------------|------------|------------|----|
| TCGA-EJ-A7NN-01A-11R-A33R-07 | 8841.36119 | 4022.53483 | 7  |
| TCGA-EJ-A8FU-01A-11R-A36G-07 | 8858.87528 | 5716.38161 | 8  |
| TCGA-YL-A8HL-01A-11R-A36G-07 | 8865.21158 | 4684.28764 | 9  |
| TCGA-G9-6353-01A-11R-1965-07 | 8872.64438 | 5122.08752 | 7  |
| TCGA-YL-A8SH-01B-11R-A37L-07 | 8873.08971 | 4900.19579 | 7  |
| TCGA-CH-5745-01A-11R-1580-07 | 8873.1084  | 5076.20251 | 7  |
| TCGA-2A-A8VX-01A-11R-A37L-07 | 8875.03486 | 5112.45687 | 8  |
| TCGA-KK-A7AZ-01A-12R-A32O-07 | 8875.16529 | 5843.45042 | 7  |
| TCGA-J4-A83N-01A-11R-A352-07 | 8878.51069 | 4843.70632 | 7  |
| TCGA-G9-6369-01A-21R-1965-07 | 8895.12257 | 3802.08333 | 7  |
| TCGA-KK-A8I8-01A-11R-A36G-07 | 8897.40073 | 5633.69019 | 9  |
| TCGA-EJ-A65F-01A-21R-A311-07 | 8909.39562 | 4819.52117 | 9  |
| TCGA-VN-A88M-01A-11R-A352-07 | 8911.39416 | 5833.61363 | 7  |
| TCGA-HC-7213-01A-11R-2118-07 | 8915.61061 | 6329.59335 | 9  |
| TCGA-EJ-A46G-01A-31R-A26U-07 | 8918.39276 | 6162.30074 | 8  |
| TCGA-XQ-A8TA-01A-11R-A36G-07 | 8927.08959 | 3673.23186 | 10 |
| TCGA-EJ-5497-01A-02R-1580-07 | 8936.33522 | 4626.5117  | 7  |
| TCGA-HC-7742-01A-11R-2118-07 | 8942.25631 | 5026.27257 | 7  |
| TCGA-KK-A59Z-01A-12R-A26U-07 | 8945.29439 | 4715.15584 | 7  |
| TCGA-EJ-A7NJ-01A-22R-A352-07 | 8948.44597 | 4673.08331 | 8  |
| TCGA-KK-A8IL-01A-11R-A36G-07 | 8960.82698 | 5218.20355 | 9  |
| TCGA-EJ-A8FS-01A-11R-A352-07 | 8963.58849 | 4312.19895 | 7  |
| TCGA-HC-7079-01A-11R-1965-07 | 8969.31043 | 5747.41933 | 7  |
| TCGA-YL-A8SA-01A-21R-A37L-07 | 8970.24421 | 5181.1012  | 8  |
| TCGA-YL-A8HK-01A-11R-A36G-07 | 8980.62344 | 5479.80842 | 9  |
| TCGA-YL-A8SR-01B-11R-A37L-07 | 8984.35283 | 4291.18905 | 9  |
| TCGA-HC-A76X-01A-11R-A33R-07 | 8993.92909 | 5437.68161 | 7  |
| TCGA-J4-AAU2-01A-11R-A41O-07 | 8994.51108 | 4272.11736 | 6  |
| TCGA-V1-A9OY-01A-11R-A41O-07 | 9001.96516 | 5774.81536 | 7  |
| TCGA-YL-A9WX-01A-21R-A41O-07 | 9012.24624 | 5302.4211  | 9  |
| TCGA-KK-A8IM-01A-11R-A36G-07 | 9019.14808 | 5144.64786 | 7  |
| TCGA-2A-AAYU-01A-11R-A41O-07 | 9019.62272 | 5244.12579 | 6  |
| TCGA-V1-A8WV-01A-11R-A37L-07 | 9019.90713 | 6692.60798 | 9  |
| TCGA-EJ-7218-01B-11R-A32O-07 | 9028.38651 | 4953.73377 | 7  |
| TCGA-V1-A8WL-01A-11R-A37L-07 | 9032.39158 | 4493.67846 | 7  |
| TCGA-G9-6371-01A-11R-1789-07 | 9070.72802 | 4670.50247 | 6  |
| TCGA-V1-A8WN-01A-11R-A37L-07 | 9071.37726 | 4783.98944 | 6  |
| TCGA-J9-A8CM-01A-11R-A352-07 | 9072.87198 | 5308.13356 | 9  |
| TCGA-CH-5750-01A-11R-1580-07 | 9072.94437 | 5237.56162 | 7  |
| TCGA-HC-8265-01A-11R-2263-07 | 9077.95237 | 4844.98999 | 8  |
| TCGA-CH-5746-01A-11R-1580-07 | 9082.40947 | 4875.20061 | 7  |
| TCGA-ZG-A9LB-01A-11R-A41O-07 | 9085.21021 | 5146.41538 | 9  |
| TCGA-J4-8198-01A-11R-2263-07 | 9085.39793 | 5436.3159  | 7  |
| TCGA-V1-A9ZK-01A-11R-A41O-07 | 9094.76014 | 4326.90852 | 8  |
| TCGA-EJ-5495-01A-01R-1580-07 | 9099.50072 | 5181.32709 | 8  |
| TCGA-VP-A87D-01A-11R-A352-07 | 9100.2684  | 4976.79827 | 9  |
| TCGA-EJ-5510-01A-01R-1580-07 | 9101.72848 | 5135.3357  | 7  |
| TCGA-VP-A87C-01A-11R-A352-07 | 9102.22006 | 5413.091   | 7  |
| TCGA-KK-A8IJ-01A-11R-A352-07 | 9108.49287 | 4295.51698 | 7  |
| TCGA-XJ-A83H-01A-11R-A352-07 | 9121.57846 | 5039.9562  | 7  |
| TCGA-KK-A8II-01A-11R-A36G-07 | 9129.47645 | 4791.63903 | 9  |

|                              |            |            |   |
|------------------------------|------------|------------|---|
| TCGA-EJ-5508-01A-02R-1580-07 | 9135.72896 | 4493.37443 | 7 |
| TCGA-J4-A6G3-01A-11R-A311-07 | 9136.14259 | 4702.56385 | 8 |
| TCGA-H9-7775-01A-11R-2118-07 | 9142.32914 | 4442.36254 | 7 |
| TCGA-HC-7750-01A-11R-2118-07 | 9145.20487 | 4991.84803 | 7 |
| TCGA-VP-A876-01A-11R-A352-07 | 9158.57076 | 5007.56567 | 8 |
| TCGA-XJ-A9DX-01A-11R-A37L-07 | 9165.1772  | 5149.02335 | 9 |
| TCGA-ZG-A9L5-01A-12R-A41O-07 | 9174.21569 | 6274.89825 | 9 |
| TCGA-YL-A8SB-01A-31R-A37L-07 | 9174.92389 | 4609.64109 | 9 |
| TCGA-G9-6494-01A-11R-1789-07 | 9175.30062 | 4370.27049 | 7 |
| TCGA-KK-A7B1-01A-11R-A32O-07 | 9176.90401 | 5097.09126 | 7 |
| TCGA-HC-7821-01A-12R-2118-07 | 9177.18377 | 4939.82442 | 8 |
| TCGA-YL-A8S9-01A-11R-A37L-07 | 9177.3546  | 4787.29033 | 9 |
| TCGA-V1-A8ML-01A-11R-A37L-07 | 9180.08415 | 4645.90932 | 7 |
| TCGA-CH-5744-01A-11R-1580-07 | 9185.53376 | 5141.15968 | 7 |
| TCGA-KK-A7AU-01A-11R-A32O-07 | 9213.85948 | 4902.60329 | 9 |
| TCGA-YL-A8SL-01B-21R-A37L-07 | 9220.7307  | 5802.72383 | 8 |
| TCGA-KK-A8IK-01A-11R-A36G-07 | 9223.4436  | 5388.16809 | 9 |
| TCGA-HC-7231-01A-11R-2118-07 | 9228.17627 | 4632.81592 | 7 |
| TCGA-V1-A9Z7-01A-11R-A41O-07 | 9230.09343 | 4668.46179 | 9 |
| TCGA-M7-A725-01A-12R-A32O-07 | 9235.42169 | 4478.22155 | 7 |
| TCGA-EJ-7791-01A-11R-2118-07 | 9238.05747 | 4767.23777 | 7 |
| TCGA-M7-A721-01A-12R-A32O-07 | 9239.42932 | 4839.11323 | 7 |
| TCGA-V1-A8X3-01A-11R-A37L-07 | 9254.84003 | 4773.00147 | 7 |
| TCGA-CH-5738-01A-11R-1580-07 | 9255.0891  | 4754.30404 | 6 |
| TCGA-KK-A8I9-01A-11R-A36G-07 | 9262.21339 | 4712.50971 | 8 |
| TCGA-2A-AAYF-01A-11R-A41O-07 | 9263.12409 | 3489.27545 | 7 |
| TCGA-CH-5764-01A-21R-1580-07 | 9265.60066 | 4625.35221 | 7 |
| TCGA-YL-A8HJ-01A-11R-A36G-07 | 9281.67845 | 5904.40057 | 9 |
| TCGA-EJ-A8FN-01A-11R-A352-07 | 9282.12023 | 4756.45724 | 7 |
| TCGA-J4-A83L-01A-11R-A352-07 | 9292.26064 | 4460.96545 | 7 |
| TCGA-XK-AAJA-01A-11R-A41O-07 | 9294.07759 | 5050.64592 | 7 |
| TCGA-KK-A8ID-01A-11R-A36G-07 | 9294.22087 | 6318.96665 | 9 |
| TCGA-XK-AAJ3-01A-11R-A41O-07 | 9297.65149 | 4526.15834 | 8 |
| TCGA-YL-A9WJ-01A-11R-A37L-07 | 9305.24702 | 4553.68367 | 8 |
| TCGA-YL-A8SC-01A-11R-A37L-07 | 9311.43657 | 5149.43505 | 9 |
| TCGA-FC-7708-01A-11R-2118-07 | 9315.4644  | 4437.58525 | 7 |
| TCGA-CH-5771-01A-21R-1580-07 | 9319.61213 | 5428.38292 | 7 |
| TCGA-V1-A9O9-01A-11R-A41O-07 | 9321.88621 | 4966.24941 | 8 |
| TCGA-EJ-A7NH-01A-12R-A33R-07 | 9328.32068 | 4716.09894 | 7 |
| TCGA-HC-7737-01A-11R-2118-07 | 9328.34147 | 4663.71392 | 7 |
| TCGA-KK-A7AP-01A-12R-A33R-07 | 9333.91679 | 6828.15313 | 9 |
| TCGA-2A-A8W1-01A-11R-A37L-07 | 9345.6172  | 4461.09038 | 7 |
| TCGA-HC-A9TH-01A-11R-A41O-07 | 9356.23692 | 4866.58658 | 9 |
| TCGA-V1-A9O5-01A-11R-A41O-07 | 9358.50035 | 4877.0168  | 9 |
| TCGA-J4-A83M-01A-11R-A352-07 | 9364.55339 | 5606.69904 | 7 |
| TCGA-HC-8256-01A-11R-2263-07 | 9368.76899 | 3638.19099 | 7 |
| TCGA-SU-A7E7-01A-22R-A33R-07 | 9375.35794 | 4520.80412 | 8 |
| TCGA-VN-A88N-01A-11R-A36G-07 | 9375.49802 | 4225.33824 | 7 |
| TCGA-KC-A4BV-01A-31R-A26U-07 | 9433.72931 | 5348.92443 | 9 |
| TCGA-J4-A83K-01A-11R-A352-07 | 9440.5257  | 5028.81107 | 6 |
| TCGA-EJ-7786-01A-11R-2118-07 | 9463.9795  | 4412.79186 | 7 |

|                              |            |            |    |
|------------------------------|------------|------------|----|
| TCGA-ZG-A9KY-01A-11R-A41O-07 | 9483.6521  | 4114.06543 | 9  |
| TCGA-CH-5753-01A-11R-1580-07 | 9486.80579 | 4404.30219 | 9  |
| TCGA-XK-AAIV-01A-11R-A41O-07 | 9492.82269 | 5548.59032 | 10 |
| TCGA-KC-A4BL-01A-31R-A250-07 | 9501.51509 | 4992.35736 | 7  |
| TCGA-VP-A87K-01A-11R-A352-07 | 9502.90739 | 5103.52139 | 8  |
| TCGA-G9-6333-01A-12R-1965-07 | 9507.61473 | 3946.39611 | 7  |
| TCGA-XQ-A8TB-01A-11R-A36G-07 | 9521.53769 | 5221.69099 | 9  |
| TCGA-YL-A9WI-01A-11R-A37L-07 | 9522.14646 | 5279.26684 | 9  |
| TCGA-CH-5766-01A-11R-1580-07 | 9524.97148 | 4249.02045 | 7  |
| TCGA-J4-A83I-01A-11R-A36G-07 | 9534.56932 | 4771.0109  | 7  |
| TCGA-TP-A8TV-01A-11R-A41O-07 | 9542.72516 | 4027.41389 | 7  |
| TCGA-EJ-7314-01A-31R-2118-07 | 9557.66008 | 4982.39637 | 7  |
| TCGA-HC-7081-01A-11R-1965-07 | 9575.03119 | 5281.76178 | 9  |
| TCGA-VN-A88P-01A-11R-A352-07 | 9575.5829  | 4528.46073 | 7  |
| TCGA-VP-A879-01A-11R-A352-07 | 9576.27939 | 4432.65211 | 9  |
| TCGA-EJ-A46I-01A-12R-A26U-07 | 9583.37937 | 4910.36604 | 7  |
| TCGA-HC-7820-01A-11R-2118-07 | 9589.61609 | 4801.11684 | 7  |
| TCGA-HC-7210-01A-11R-2118-07 | 9594.79414 | 4554.15242 | 7  |
| TCGA-EJ-5503-01A-01R-1580-07 | 9609.49608 | 4831.43067 | 8  |
| TCGA-EJ-7785-01A-11R-2118-07 | 9623.82124 | 5193.79044 | 7  |
| TCGA-YL-A9WK-01A-11R-A37L-07 | 9626.24565 | 4821.81111 | 9  |
| TCGA-YL-A8S8-01A-11R-A37L-07 | 9638.03674 | 4755.47491 | 9  |
| TCGA-EJ-5511-01A-01R-1580-07 | 9647.5775  | 5023.7147  | 7  |
| TCGA-HC-7745-01A-11R-2118-07 | 9662.12331 | 4729.18169 | 7  |
| TCGA-HC-A76W-01A-11R-A33R-07 | 9665.1269  | 5269.63942 | 7  |
| TCGA-VN-A943-01A-11R-A41O-07 | 9677.13585 | 3631.19157 | 8  |
| TCGA-EJ-7788-01A-11R-2118-07 | 9687.70055 | 4641.40247 | 7  |
| TCGA-YL-A8SP-01B-11R-A37L-07 | 9689.38374 | 5693.3823  | 9  |
| TCGA-KC-A4BN-01A-61R-A250-07 | 9700.84247 | 4022.5046  | 7  |
| TCGA-EJ-5532-01A-01R-1580-07 | 9712.43031 | 3712.3388  | 7  |
| TCGA-Y6-A9XI-01A-11R-A41O-07 | 9714.66542 | 3557.14418 | 8  |
| TCGA-G9-6377-01A-11R-1965-07 | 9729.62666 | 4544.05673 | 7  |
| TCGA-V1-A9OL-01A-11R-A41O-07 | 9733.1529  | 4322.99447 | 9  |
| TCGA-HC-7748-01A-11R-2118-07 | 9753.71875 | 4787.97969 | 6  |
| TCGA-XK-AAJP-01A-11R-A41O-07 | 9760.53693 | 3839.23507 | 7  |
| TCGA-CH-5752-01A-11R-1580-07 | 9763.95277 | 4671.48027 | 8  |
| TCGA-EJ-7781-01A-11R-2118-07 | 9765.4154  | 4670.64956 | 7  |
| TCGA-VP-A87H-01A-11R-A352-07 | 9766.08937 | 4897.14199 | 9  |
| TCGA-VN-A88O-01A-11R-A352-07 | 9780.7894  | 3906.88934 | 7  |
| TCGA-HC-7744-01A-11R-2118-07 | 9810.12033 | 4945.96731 | 7  |
| TCGA-EJ-5494-01A-01R-1580-07 | 9817.66969 | 4443.78    | 7  |
| TCGA-EJ-7115-01A-11R-2118-07 | 9821.35112 | 4274.32763 | 7  |
| TCGA-EJ-7782-01A-11R-2118-07 | 9832.51356 | 4259.93425 | 8  |
| TCGA-HC-A4ZV-01A-11R-A26U-07 | 9842.60336 | 3341.58027 | 9  |
| TCGA-CH-5794-01A-11R-1580-07 | 9848.15629 | 4845.54321 | 7  |
| TCGA-HC-7080-01A-11R-1965-07 | 9849.63441 | 3855.14966 | 7  |
| TCGA-EJ-5530-01A-01R-1580-07 | 9855.32881 | 4795.08545 | 7  |
| TCGA-EJ-5501-01A-01R-1580-07 | 9868.12956 | 4760.48003 | 7  |
| TCGA-EJ-A46H-01A-31R-A26U-07 | 9878.42385 | 5040.01917 | 7  |
| TCGA-HC-7818-01A-11R-2118-07 | 9892.72932 | 4289.8088  | 7  |
| TCGA-J9-A8CL-01A-11R-A352-07 | 9894.72876 | 4057.04894 | 9  |



|                              |            |            |    |
|------------------------------|------------|------------|----|
| TCGA-CH-5754-01A-11R-1580-07 | 9934.44437 | 3970.61193 | 9  |
| TCGA-HC-7075-01A-11R-1965-07 | 9940.20102 | 4101.58974 | 6  |
| TCGA-HC-7230-01A-11R-2118-07 | 9942.38907 | 4250.08474 | 7  |
| TCGA-EJ-7789-01A-11R-2118-07 | 9943.80938 | 4487.66938 | 7  |
| TCGA-VP-A87B-01A-11R-A352-07 | 9943.90897 | 5477.44131 | 8  |
| TCGA-2A-A8VT-01A-11R-A37L-07 | 9979.11956 | 4754.70257 | 9  |
| TCGA-V1-A8WS-01A-11R-A37L-07 | 9995.2176  | 5200.1357  | 6  |
| TCGA-EJ-5518-01A-01R-1580-07 | 9995.75752 | 3947.59239 | 9  |
| TCGA-HC-7749-01A-11R-2118-07 | 10011.6923 | 4239.11165 | 7  |
| TCGA-J4-AATZ-01A-11R-A41O-07 | 10020.8894 | 3946.34275 | 9  |
| TCGA-FC-A4JI-01A-11R-A250-07 | 10041.2075 | 4623.90014 | 8  |
| TCGA-CH-5761-01A-11R-1580-07 | 10046.5204 | 4066.65165 | 9  |
| TCGA-HC-7209-01A-11R-2118-07 | 10052.0942 | 3964.25926 | 6  |
| TCGA-CH-5751-01A-11R-1580-07 | 10052.6408 | 4403.32277 | 10 |
| TCGA-EJ-7794-01A-11R-2118-07 | 10062.6667 | 4414.05543 | 7  |
| TCGA-YL-A8SJ-01B-11R-A37L-07 | 10089.5333 | 4831.32989 | 9  |
| TCGA-EJ-7123-01A-11R-1965-07 | 10092.4643 | 4196.24547 | 7  |
| TCGA-HC-7233-01A-11R-2118-07 | 10102.4984 | 4227.81711 | 7  |
| TCGA-CH-5792-01A-11R-1580-07 | 10177.3837 | 4700.83581 | 9  |
| TCGA-EJ-5502-01A-01R-1580-07 | 10207.3465 | 4498.53764 | 7  |
| TCGA-HC-7736-01A-11R-2118-07 | 10244.6897 | 4165.94502 | 7  |
| TCGA-EJ-7330-01A-11R-2118-07 | 10248.2313 | 4291.91757 | 7  |
| TCGA-EJ-5509-01A-01R-1580-07 | 10250.2753 | 4182.43298 | 7  |
| TCGA-HC-7212-01A-11R-2118-07 | 10291.3617 | 4234.97083 | 7  |
| TCGA-V1-A9ZG-01A-11R-A41O-07 | 10363.7682 | 4907.85799 | 9  |
| TCGA-KC-A7FD-01A-11R-A33R-07 | 10398.0363 | 4395.94589 | 7  |
| TCGA-EJ-7327-01A-11R-2118-07 | 10418.9644 | 4469.46814 | 7  |
| TCGA-HC-7077-01A-11R-1965-07 | 10455.7171 | 4037.52537 | 6  |
| TCGA-EJ-5519-01A-01R-1580-07 | 10542.6469 | 4322.49788 | 8  |
| TCGA-WW-A8ZI-01A-11R-A37L-07 | 10643.4556 | 4340.38268 | 8  |
| TCGA-YL-A9WL-01A-11R-A41O-07 | 10829.2378 | 3912.73406 | 9  |
| TCGA-XK-AAIW-01A-11R-A41O-07 | 11173.3766 | 3760.48558 | 9  |
| TCGA-YJ-A8SW-01A-11R-A37L-07 | 11321.8783 | 2470.16456 | 9  |

Transcripts median value: KHSRP is 8732 FPKM and Ubc9 is 5112 FPKM.  
The value higher than the median value is in red and the value lower than the median value is in green.
