# Supplementary material for: SUMO1 modification of KHSRP regulates tumorigenesis by preventing the TL-G-Rich miRNA biogenesis
Source: Springer Nature journal article supplement (doi:10.1186/s12943-017-0724-6), 2017-10-11
Supplement: MOESM8 [file 15127168]

**Additional file 8: Table S2. The miRNA expression in DU145 shRNA-Control and shRNA-KHSRP stabel cell lines was presented in the normalized RPM (Reads per Million)**

| miRNA           | precursor      | shCtrl (RPM) | shKHSRP (RPM) |
|-----------------|----------------|--------------|---------------|
| hsa-miR-21-5p   | hsa-mir-21     | 324804.44    | 342541.17     |
| hsa-let-7i-5p   | hsa-let-7i     | 66743.11     | 49900.27      |
| hsa-let-7f-5p   | hsa-let-7f-2   | 49544.25     | 47289.82      |
| hsa-let-7f-5p   | hsa-let-7f-1   | 48965.41     | 46524.02      |
| hsa-miR-30a-5p  | hsa-mir-30a    | 32123.06     | 31488.56      |
| hsa-miR-7-5p    | hsa-mir-7-1    | 25654.95     | 37290.64      |
| hsa-miR-7-5p    | hsa-mir-7-2    | 25442.43     | 36948.44      |
| hsa-miR-7-5p    | hsa-mir-7-3    | 25440.65     | 36948.35      |
| hsa-let-7g-5p   | hsa-let-7g     | 24701.22     | 21522.03      |
| hsa-let-7a-5p   | hsa-let-7a-3   | 18978.32     | 15824.84      |
| hsa-let-7a-5p   | hsa-let-7a-1   | 18877.54     | 15787.97      |
| hsa-let-7a-5p   | hsa-let-7a-2   | 18870.93     | 15783.12      |
| hsa-miR-148a-3p | hsa-mir-148a   | 18727.74     | 13999.06      |
| hsa-miR-151a-3p | hsa-mir-151a   | 16250.06     | 17278.49      |
| hsa-miR-92a-3p  | hsa-mir-92a-1  | 12917.92     | 14312.29      |
| hsa-miR-92a-3p  | hsa-mir-92a-2  | 12261.01     | 13469.62      |
| hsa-miR-30d-5p  | hsa-mir-30d    | 10406.05     | 10579.55      |
| hsa-miR-146a-5p | hsa-mir-146a   | 9669.05      | 783.08        |
| hsa-miR-26a-5p  | hsa-mir-26a-2  | 7795.53      | 8699.49       |
| hsa-miR-26a-5p  | hsa-mir-26a-1  | 7789.18      | 8691.96       |
| hsa-miR-24-3p   | hsa-mir-24-1   | 7137.15      | 6087.59       |
| hsa-miR-24-3p   | hsa-mir-24-2   | 7119.61      | 6061.88       |
| hsa-miR-103a-3p | hsa-mir-103a-2 | 6756.26      | 6642.66       |
| hsa-miR-103a-3p | hsa-mir-103a-1 | 6680.98      | 6564.21       |
| hsa-miR-200b-3p | hsa-mir-200b   | 6133.37      | 3721.53       |
| hsa-miR-30c-5p  | hsa-mir-30c-2  | 5956.56      | 6476.1        |
| hsa-miR-30c-5p  | hsa-mir-30c-1  | 5952.52      | 6469.34       |
| hsa-miR-27b-3p  | hsa-mir-27b    | 5942.88      | 5221.07       |
| hsa-miR-27a-3p  | hsa-mir-27a    | 5556.35      | 5374.49       |
| hsa-miR-99b-5p  | hsa-mir-99b    | 5333.93      | 3796.95       |
| hsa-miR-10a-5p  | hsa-mir-10a    | 5278.55      | 5130.1        |
| hsa-miR-30a-3p  | hsa-mir-30a    | 5071.4       | 4838.01       |
| hsa-miR-29a-3p  | hsa-mir-29a    | 4573         | 4841.64       |
| hsa-miR-378a-3p | hsa-mir-378a   | 4430.92      | 4452.32       |
| hsa-miR-423-3p  | hsa-mir-423    | 4416.36      | 5178.49       |
| hsa-miR-148b-3p | hsa-mir-148b   | 4276.5       | 2527.68       |
| hsa-miR-222-3p  | hsa-mir-222    | 3730.62      | 4148.9        |
| hsa-miR-221-3p  | hsa-mir-221    | 3727.02      | 3349.4        |
| hsa-let-7b-5p   | hsa-let-7b     | 3690.51      | 2787.94       |
| hsa-miR-23a-3p  | hsa-mir-23a    | 3584.54      | 3053.14       |
| hsa-miR-182-5p  | hsa-mir-182    | 3407.6       | 2965.39       |
| hsa-miR-191-5p  | hsa-mir-191    | 3266.81      | 3303.33       |
| hsa-miR-128-3p  | hsa-mir-128-1  | 3125.71      | 2355.86       |
| hsa-miR-532-5p  | hsa-mir-532    | 3088.45      | 3191.54       |
| hsa-miR-26b-5p  | hsa-mir-26b    | 2996.24      | 2486.64       |
| hsa-miR-98-5p   | hsa-mir-98     | 2865.31      | 2072.93       |
| hsa-miR-10b-5p  | hsa-mir-10b    | 2825.96      | 3888.51       |

|                 |                |         |         |
|-----------------|----------------|---------|---------|
| hsa-miR-25-3p   | hsa-mir-25     | 2747.8  | 3185.87 |
| hsa-let-7d-5p   | hsa-let-7d     | 2625.13 | 2109.62 |
| hsa-miR-128-3p  | hsa-mir-128-2  | 2587.24 | 1819.88 |
| hsa-miR-183-5p  | hsa-mir-183    | 2481.41 | 1564.25 |
| hsa-miR-941     | hsa-mir-941-1  | 2464.09 | 3093.59 |
| hsa-miR-941     | hsa-mir-941-2  | 2464.09 | 3093.59 |
| hsa-miR-941     | hsa-mir-941-3  | 2464.09 | 3093.59 |
| hsa-miR-941     | hsa-mir-941-4  | 2464.09 | 3093.59 |
| hsa-miR-941     | hsa-mir-941-5  | 2464.09 | 3093.59 |
| hsa-miR-320a    | hsa-mir-320a   | 2302.64 | 2545.01 |
| hsa-miR-9-5p    | hsa-mir-9-3    | 2166.34 | 2092.34 |
| hsa-miR-9-5p    | hsa-mir-9-2    | 2165.59 | 2092.07 |
| hsa-miR-9-5p    | hsa-mir-9-1    | 2165.5  | 2091.93 |
| hsa-miR-1307-3p | hsa-mir-1307   | 2143.29 | 2078.92 |
| hsa-miR-20a-5p  | hsa-mir-20a    | 1829.07 | 2579.97 |
| hsa-let-7e-5p   | hsa-let-7e     | 1563.7  | 1185.09 |
| hsa-miR-340-5p  | hsa-mir-340    | 1494.64 | 1112.4  |
| hsa-miR-17-5p   | hsa-mir-17     | 1493.3  | 1918.65 |
| hsa-miR-27a-5p  | hsa-mir-27a    | 1465.23 | 1769.14 |
| hsa-miR-200a-3p | hsa-mir-200a   | 1339.1  | 793.92  |
| hsa-miR-30e-5p  | hsa-mir-30e    | 1320.27 | 1521.26 |
| hsa-miR-22-3p   | hsa-mir-22     | 1316.49 | 1397.69 |
| hsa-miR-125a-5p | hsa-mir-125a   | 1298.86 | 1497.18 |
| hsa-miR-30e-3p  | hsa-mir-30e    | 1065.25 | 1192.8  |
| hsa-miR-378i    | hsa-mir-378i   | 1037.67 | 674.2   |
| hsa-miR-101-3p  | hsa-mir-101-2  | 963.94  | 881.21  |
| hsa-miR-744-5p  | hsa-mir-744    | 952.13  | 997.31  |
| hsa-miR-106b-3p | hsa-mir-106b   | 950.22  | 854.59  |
| hsa-miR-101-3p  | hsa-mir-101-1  | 932.14  | 848.47  |
| hsa-miR-423-5p  | hsa-mir-423    | 919.22  | 1059.25 |
| hsa-miR-140-3p  | hsa-mir-140    | 906.96  | 1019.75 |
| hsa-miR-92b-3p  | hsa-mir-92b    | 905.05  | 801.81  |
| hsa-let-7c-5p   | hsa-let-7c     | 893.95  | 585.68  |
| hsa-miR-93-5p   | hsa-mir-93     | 863.04  | 954.77  |
| hsa-miR-31-5p   | hsa-mir-31     | 778.52  | 615.2   |
| hsa-miR-1303    | hsa-mir-1303   | 749.34  | 798.54  |
| hsa-miR-186-5p  | hsa-mir-186    | 748.27  | 971.28  |
| hsa-miR-192-5p  | hsa-mir-192    | 736.37  | 864.75  |
| hsa-miR-21-3p   | hsa-mir-21     | 722.82  | 516.29  |
| hsa-miR-484     | hsa-mir-484    | 717.58  | 719.73  |
| hsa-miR-99b-3p  | hsa-mir-99b    | 712.3   | 484.19  |
| hsa-miR-4521    | hsa-mir-4521   | 711.37  | 1136.89 |
| hsa-miR-429     | hsa-mir-429    | 708.17  | 296.99  |
| hsa-miR-361-3p  | hsa-mir-361    | 702.08  | 750.56  |
| hsa-miR-374b-5p | hsa-mir-374b   | 628.67  | 488.99  |
| hsa-miR-200a-5p | hsa-mir-200a   | 621.83  | 429.5   |
| hsa-let-7a-3p   | hsa-let-7a-1   | 613.39  | 728.12  |
| hsa-let-7a-3p   | hsa-let-7a-3   | 610.37  | 726.53  |
| hsa-miR-181b-5p | hsa-mir-181b-2 | 608.77  | 483.64  |
| hsa-miR-28-3p   | hsa-mir-28     | 590.74  | 747.25  |
| hsa-miR-181b-5p | hsa-mir-181b-1 | 578.08  | 459.02  |

|                  |                |        |        |
|------------------|----------------|--------|--------|
| hsa-miR-2682-5p  | hsa-mir-2682   | 559.07 | 338.8  |
| hsa-miR-181a-5p  | hsa-mir-181a-1 | 556.19 | 547.72 |
| hsa-miR-181a-5p  | hsa-mir-181a-2 | 555.43 | 547.31 |
| hsa-miR-126-3p   | hsa-mir-126    | 510.62 | 256.81 |
| hsa-miR-130b-5p  | hsa-mir-130b   | 500.45 | 395.44 |
| hsa-miR-23b-3p   | hsa-mir-23b    | 469.31 | 506.41 |
| hsa-miR-185-5p   | hsa-mir-185    | 459.32 | 454.48 |
| hsa-miR-425-5p   | hsa-mir-425    | 451.24 | 445.23 |
| hsa-miR-221-5p   | hsa-mir-221    | 448.48 | 548.13 |
| hsa-miR-769-5p   | hsa-mir-769    | 445.15 | 329.19 |
| hsa-miR-146b-5p  | hsa-mir-146b   | 428.19 | 216.95 |
| hsa-miR-3615     | hsa-mir-3615   | 421.75 | 456.89 |
| hsa-let-7d-3p    | hsa-let-7d     | 419.48 | 369.41 |
| hsa-miR-30c-2-3p | hsa-mir-30c-2  | 402.78 | 367.46 |
| hsa-miR-196b-5p  | hsa-mir-196b   | 377.51 | 422.65 |
| hsa-miR-32-5p    | hsa-mir-32     | 375.07 | 266.92 |
| hsa-miR-7974     | hsa-mir-7974   | 372.14 | 577.33 |
| hsa-miR-16-5p    | hsa-mir-16-1   | 364.1  | 458.2  |
| hsa-miR-16-5p    | hsa-mir-16-2   | 363.83 | 457.25 |
| hsa-miR-24-2-5p  | hsa-mir-24-2   | 363.08 | 334.08 |
| hsa-miR-96-5p    | hsa-mir-96     | 354.19 | 342.43 |
| hsa-miR-1260b    | hsa-mir-1260b  | 345.05 | 271.86 |
| hsa-miR-107      | hsa-mir-107    | 343.09 | 249.78 |
| hsa-miR-16-2-3p  | hsa-mir-16-2   | 332.52 | 433.62 |
| hsa-miR-29b-3p   | hsa-mir-29b-2  | 322.62 | 247.74 |
| hsa-miR-29b-3p   | hsa-mir-29b-1  | 322.48 | 247.69 |
| hsa-miR-30b-5p   | hsa-mir-30b    | 309.12 | 248.87 |
| hsa-miR-574-5p   | hsa-mir-574    | 301.74 | 307.6  |
| hsa-miR-197-3p   | hsa-mir-197    | 296.19 | 238.13 |
| hsa-miR-100-5p   | hsa-mir-100    | 294.59 | 44.4   |
| hsa-miR-330-3p   | hsa-mir-330    | 292.37 | 181.89 |
| hsa-miR-1260a    | hsa-mir-1260a  | 285.84 | 231.78 |
| hsa-miR-196a-5p  | hsa-mir-196a-2 | 285.8  | 273.91 |
| hsa-miR-363-3p   | hsa-mir-363    | 283.67 | 432.58 |
| hsa-miR-1180-3p  | hsa-mir-1180   | 271.36 | 297.99 |
| hsa-miR-99a-5p   | hsa-mir-99a    | 256.62 | 389.18 |
| hsa-miR-181a-3p  | hsa-mir-181a-1 | 251.96 | 167.2  |
| hsa-miR-196a-5p  | hsa-mir-196a-1 | 248    | 234.27 |
| hsa-miR-320b     | hsa-mir-320b-1 | 246.63 | 230.28 |
| hsa-miR-500a-3p  | hsa-mir-500a   | 244.18 | 231.14 |
| hsa-miR-374a-5p  | hsa-mir-374a   | 243.47 | 218.58 |
| hsa-miR-548o-3p  | hsa-mir-548o   | 238.68 | 394.9  |
| hsa-miR-548o-3p  | hsa-mir-548o-2 | 238.68 | 394.9  |
| hsa-miR-589-5p   | hsa-mir-589    | 233.17 | 244.07 |
| hsa-miR-374a-3p  | hsa-mir-374a   | 232.01 | 190.1  |
| hsa-miR-7706     | hsa-mir-7706   | 224.51 | 161.76 |
| hsa-miR-15b-5p   | hsa-mir-15b    | 199.1  | 193.37 |
| hsa-miR-378c     | hsa-mir-378c   | 196.79 | 162.44 |
| hsa-miR-320b     | hsa-mir-320b-2 | 188.62 | 184.84 |
| hsa-miR-342-3p   | hsa-mir-342    | 188.31 | 199.76 |
| hsa-miR-501-3p   | hsa-mir-501    | 181.56 | 166.29 |

|                   |                |        |        |
|-------------------|----------------|--------|--------|
| hsa-miR-140-5p    | hsa-mir-140    | 179.52 | 285.88 |
| hsa-miR-660-5p    | hsa-mir-660    | 177.92 | 190.65 |
| hsa-miR-335-3p    | hsa-mir-335    | 167.35 | 130.69 |
| hsa-miR-32-3p     | hsa-mir-32     | 153.63 | 132.46 |
| hsa-miR-339-5p    | hsa-mir-339    | 153.14 | 150.24 |
| hsa-miR-361-5p    | hsa-mir-361    | 151.09 | 146.93 |
| hsa-miR-331-3p    | hsa-mir-331    | 144.3  | 166.2  |
| hsa-miR-455-5p    | hsa-mir-455    | 140.83 | 161.08 |
| hsa-miR-381-3p    | hsa-mir-381    | 137.28 | 114.01 |
| hsa-miR-148a-5p   | hsa-mir-148a   | 137.24 | 110.97 |
| hsa-miR-151a-5p   | hsa-mir-151a   | 129.6  | 119.58 |
| hsa-miR-19b-3p    | hsa-mir-19b-2  | 124.58 | 194.45 |
| hsa-miR-193a-5p   | hsa-mir-193a   | 123.82 | 132.83 |
| hsa-miR-19b-3p    | hsa-mir-19b-1  | 121.69 | 192.14 |
| hsa-miR-181a-2-3p | hsa-mir-181a-2 | 117.47 | 130.33 |
| hsa-miR-454-3p    | hsa-mir-454    | 117.12 | 136.23 |
| hsa-miR-4326      | hsa-mir-4326   | 116.18 | 143.53 |
| hsa-miR-615-3p    | hsa-mir-615    | 116.1  | 108.93 |
| hsa-miR-15b-3p    | hsa-mir-15b    | 109.3  | 97.95  |
| hsa-miR-106b-5p   | hsa-mir-106b   | 108.63 | 95.28  |
| hsa-miR-345-5p    | hsa-mir-345    | 105.04 | 107.39 |
| hsa-miR-365a-3p   | hsa-mir-365a   | 94.42  | 68.2   |
| hsa-miR-365b-3p   | hsa-mir-365b   | 94.42  | 68.2   |
| hsa-let-7f-1-3p   | hsa-let-7f-1   | 94.29  | 126.39 |
| hsa-miR-132-3p    | hsa-mir-132    | 92.56  | 122.03 |
| hsa-miR-340-3p    | hsa-mir-340    | 92.25  | 84.62  |
| hsa-miR-877-5p    | hsa-mir-877    | 90.25  | 52.6   |
| hsa-miR-1304-3p   | hsa-mir-1304   | 89.89  | 89.06  |
| hsa-miR-130a-3p   | hsa-mir-130a   | 89.67  | 111.19 |
| hsa-miR-301a-5p   | hsa-mir-301a   | 88.74  | 48.93  |
| hsa-miR-574-3p    | hsa-mir-574    | 87.8   | 84.76  |
| hsa-miR-502-3p    | hsa-mir-502    | 86.96  | 86.75  |
| hsa-miR-149-5p    | hsa-mir-149    | 86.65  | 56.1   |
| hsa-miR-218-5p    | hsa-mir-218-1  | 86.25  | 164.93 |
| hsa-miR-421       | hsa-mir-421    | 85.36  | 50.84  |
| hsa-miR-218-5p    | hsa-mir-218-2  | 84.74  | 160.85 |
| hsa-miR-19a-3p    | hsa-mir-19a    | 80.74  | 134.19 |
| hsa-miR-548am-3p  | hsa-mir-548am  | 80.7   | 80.77  |
| hsa-miR-339-3p    | hsa-mir-339    | 78.79  | 83.62  |
| hsa-miR-362-5p    | hsa-mir-362    | 78.52  | 99.13  |
| hsa-miR-935       | hsa-mir-935    | 77.28  | 92.92  |
| hsa-miR-137       | hsa-mir-137    | 75.77  | 74.64  |
| hsa-miR-330-5p    | hsa-mir-330    | 73.64  | 44.44  |
| hsa-miR-378d      | hsa-mir-378d-2 | 73.19  | 62.26  |
| hsa-miR-378d      | hsa-mir-378d-1 | 71.55  | 60.27  |
| hsa-miR-320c      | hsa-mir-320c-1 | 70.48  | 57.05  |
| hsa-miR-210-3p    | hsa-mir-210    | 70.31  | 51.65  |
| hsa-miR-320c      | hsa-mir-320c-2 | 67.51  | 54.37  |
| hsa-miR-4664-3p   | hsa-mir-4664   | 66.44  | 54.19  |
| hsa-miR-374b-3p   | hsa-mir-374b   | 66.18  | 54.74  |
| hsa-miR-194-5p    | hsa-mir-194-2  | 62.93  | 72.47  |

|                  |                |       |       |
|------------------|----------------|-------|-------|
| hsa-miR-598-3p   | hsa-mir-598    | 62.4  | 62.45 |
| hsa-miR-22-5p    | hsa-mir-22     | 61.78 | 73.51 |
| hsa-let-7b-3p    | hsa-let-7b     | 61.25 | 60.4  |
| hsa-miR-331-5p   | hsa-mir-331    | 60.62 | 65.03 |
| hsa-miR-31-3p    | hsa-mir-31     | 58.31 | 46.8  |
| hsa-miR-3613-5p  | hsa-mir-3613   | 58.09 | 43.22 |
| hsa-miR-10a-3p   | hsa-mir-10a    | 58    | 48.84 |
| hsa-miR-27b-5p   | hsa-mir-27b    | 57.96 | 83.62 |
| hsa-miR-28-5p    | hsa-mir-28     | 57.52 | 62.85 |
| hsa-miR-505-3p   | hsa-mir-505    | 57.16 | 56.69 |
| hsa-miR-148b-5p  | hsa-mir-148b   | 56.36 | 45.85 |
| hsa-miR-548k     | hsa-mir-548k   | 55.92 | 56.55 |
| hsa-miR-34a-5p   | hsa-mir-34a    | 55.25 | 56.46 |
| hsa-miR-671-3p   | hsa-mir-671    | 54.23 | 67.52 |
| hsa-miR-425-3p   | hsa-mir-425    | 54.01 | 40.59 |
| hsa-miR-625-3p   | hsa-mir-625    | 53.96 | 74.87 |
| hsa-miR-328-3p   | hsa-mir-328    | 53.3  | 49.48 |
| hsa-miR-18a-5p   | hsa-mir-18a    | 50.85 | 63.26 |
| hsa-miR-152-3p   | hsa-mir-152    | 50.68 | 42.22 |
| hsa-miR-1296-5p  | hsa-mir-1296   | 50.54 | 31.74 |
| hsa-miR-760      | hsa-mir-760    | 50.41 | 31.47 |
| hsa-miR-200b-5p  | hsa-mir-200b   | 48.59 | 33.2  |
| hsa-miR-92b-5p   | hsa-mir-92b    | 48.41 | 41.63 |
| hsa-miR-203a-3p  | hsa-mir-203a   | 47.92 | 26.35 |
| hsa-miR-181d-5p  | hsa-mir-181d   | 47.12 | 39.32 |
| hsa-miR-30d-3p   | hsa-mir-30d    | 45.08 | 54.96 |
| hsa-miR-194-5p   | hsa-mir-194-1  | 44.95 | 52.2  |
| hsa-miR-548f-3p  | hsa-mir-548f-2 | 44.1  | 66.53 |
| hsa-miR-548f-3p  | hsa-mir-548f-3 | 44.1  | 66.53 |
| hsa-miR-652-3p   | hsa-mir-652    | 43.52 | 30.34 |
| hsa-miR-25-5p    | hsa-mir-25     | 43.35 | 58.14 |
| hsa-miR-942-5p   | hsa-mir-942    | 43.26 | 56.96 |
| hsa-miR-106a-5p  | hsa-mir-106a   | 42.95 | 58.05 |
| hsa-miR-9-3p     | hsa-mir-9-1    | 42.77 | 43.08 |
| hsa-miR-9-3p     | hsa-mir-9-2    | 42.77 | 43.08 |
| hsa-miR-9-3p     | hsa-mir-9-3    | 42.33 | 42.9  |
| hsa-miR-185-3p   | hsa-mir-185    | 41.88 | 35.37 |
| hsa-miR-1307-5p  | hsa-mir-1307   | 40.59 | 35.96 |
| hsa-miR-132-5p   | hsa-mir-132    | 39.71 | 45.67 |
| hsa-miR-409-3p   | hsa-mir-409    | 39.62 | 22.36 |
| hsa-miR-92a-1-5p | hsa-mir-92a-1  | 38.33 | 60.63 |
| hsa-miR-125a-3p  | hsa-mir-125a   | 37.17 | 34.37 |
| hsa-miR-450b-5p  | hsa-mir-450b   | 37.17 | 21.22 |
| hsa-miR-424-3p   | hsa-mir-424    | 37.04 | 48.16 |
| hsa-miR-1278     | hsa-mir-1278   | 36.11 | 31.34 |
| hsa-miR-576-3p   | hsa-mir-576    | 36.06 | 35.64 |
| hsa-miR-532-3p   | hsa-mir-532    | 35.93 | 38    |
| hsa-let-7f-2-3p  | hsa-let-7f-2   | 35.75 | 41.72 |
| hsa-miR-455-3p   | hsa-mir-455    | 35    | 48.21 |
| hsa-miR-1271-5p  | hsa-mir-1271   | 34.73 | 38.95 |
| hsa-miR-195-3p   | hsa-mir-195    | 34.29 | 40.27 |

|                  |                |       |       |
|------------------|----------------|-------|-------|
| hsa-miR-5100     | hsa-mir-5100   | 34.2  | 29.25 |
| hsa-miR-1301-3p  | hsa-mir-1301   | 33.75 | 40.27 |
| hsa-miR-3158-3p  | hsa-mir-3158-2 | 33.67 | 44.35 |
| hsa-miR-3158-3p  | hsa-mir-3158-1 | 33.62 | 44.35 |
| hsa-miR-1257     | hsa-mir-1257   | 32.82 | 61.45 |
| hsa-miR-20b-5p   | hsa-mir-20b    | 32.16 | 50.7  |
| hsa-miR-130b-3p  | hsa-mir-130b   | 32.16 | 29.34 |
| hsa-miR-501-5p   | hsa-mir-501    | 31.98 | 30.88 |
| hsa-miR-1268b    | hsa-mir-1268b  | 31.8  | 32.38 |
| hsa-miR-629-5p   | hsa-mir-629    | 31.27 | 13.24 |
| hsa-miR-500a-5p  | hsa-mir-500a   | 30.91 | 34.19 |
| hsa-miR-379-5p   | hsa-mir-379    | 30.56 | 18.82 |
| hsa-miR-1268a    | hsa-mir-1268a  | 30.42 | 31.34 |
| hsa-miR-95-3p    | hsa-mir-95     | 30.29 | 19.95 |
| hsa-miR-222-5p   | hsa-mir-222    | 29.71 | 21.77 |
| hsa-miR-365b-5p  | hsa-mir-365b   | 29.67 | 29.39 |
| hsa-miR-454-5p   | hsa-mir-454    | 29.53 | 24.03 |
| hsa-let-7e-3p    | hsa-let-7e     | 28.65 | 26.48 |
| hsa-miR-503-5p   | hsa-mir-503    | 27.76 | 24.58 |
| hsa-miR-3909     | hsa-mir-3909   | 27.36 | 29.7  |
| hsa-miR-324-3p   | hsa-mir-324    | 26.78 | 28.89 |
| hsa-miR-671-5p   | hsa-mir-671    | 26.16 | 32.61 |
| hsa-miR-30c-1-3p | hsa-mir-30c-1  | 25.94 | 29.43 |
| hsa-miR-326      | hsa-mir-326    | 25.58 | 16.1  |
| hsa-miR-7-1-3p   | hsa-mir-7-1    | 25    | 32.47 |
| hsa-miR-378a-5p  | hsa-mir-378a   | 25    | 26.98 |
| hsa-miR-18a-3p   | hsa-mir-18a    | 24.87 | 36.46 |
| hsa-miR-5701     | hsa-mir-5701-1 | 23.98 | 21.77 |
| hsa-miR-5701     | hsa-mir-5701-2 | 23.98 | 21.77 |
| hsa-miR-5701     | hsa-mir-5701-3 | 23.98 | 21.77 |
| hsa-miR-3074-5p  | hsa-mir-3074   | 22.7  | 20.27 |
| hsa-miR-378f     | hsa-mir-378f   | 22.07 | 20.45 |
| hsa-miR-450a-5p  | hsa-mir-450a-1 | 22.03 | 12.7  |
| hsa-miR-450a-5p  | hsa-mir-450a-2 | 21.98 | 12.7  |
| hsa-miR-1292-5p  | hsa-mir-1292   | 21.94 | 33.1  |
| hsa-miR-200c-3p  | hsa-mir-200c   | 21.9  | 8.48  |
| hsa-miR-128-1-5p | hsa-mir-128-1  | 21.67 | 17.73 |
| hsa-miR-5010-3p  | hsa-mir-5010   | 21.54 | 24.26 |
| hsa-miR-125b-5p  | hsa-mir-125b-1 | 21.1  | 26.66 |
| hsa-miR-654-3p   | hsa-mir-654    | 20.96 | 12.7  |
| hsa-miR-1254     | hsa-mir-1254-1 | 20.83 | 27.39 |
| hsa-miR-125b-5p  | hsa-mir-125b-2 | 20.65 | 26.48 |
| hsa-miR-1254     | hsa-mir-1254-2 | 20.52 | 27.21 |
| hsa-miR-324-5p   | hsa-mir-324    | 20.21 | 15.96 |
| hsa-miR-2277-5p  | hsa-mir-2277   | 19.72 | 17.6  |
| hsa-miR-449c-5p  | hsa-mir-449c   | 19.63 | 33.83 |
| hsa-miR-122-5p   | hsa-mir-122    | 19.1  | 16.1  |
| hsa-miR-4473     | hsa-mir-4473   | 18.79 | 16.33 |
| hsa-miR-548e-3p  | hsa-mir-548e   | 18.65 | 17.41 |
| hsa-miR-550a-5p  | hsa-mir-550a-1 | 18.56 | 19.68 |
| hsa-miR-550a-5p  | hsa-mir-550a-2 | 18.56 | 19.68 |

|                   |                |       |       |
|-------------------|----------------|-------|-------|
| hsa-miR-138-5p    | hsa-mir-138-1  | 18.43 | 26.89 |
| hsa-miR-550a-3-5p | hsa-mir-550a-1 | 18.39 | 19.36 |
| hsa-miR-550a-3-5p | hsa-mir-550a-2 | 18.39 | 19.36 |
| hsa-miR-576-5p    | hsa-mir-576    | 18.39 | 17.69 |
| hsa-miR-301b-3p   | hsa-mir-301b   | 17.81 | 10.88 |
| hsa-miR-155-5p    | hsa-mir-155    | 17.77 | 23.81 |
| hsa-miR-215-5p    | hsa-mir-215    | 17.77 | 15.65 |
| hsa-miR-151b      | hsa-mir-151b   | 17.77 | 12.2  |
| hsa-miR-2682-3p   | hsa-mir-2682   | 17.41 | 8.48  |
| hsa-miR-147b      | hsa-mir-147b   | 17.28 | 18.59 |
| hsa-miR-2110      | hsa-mir-2110   | 17.14 | 16.82 |
| hsa-miR-188-5p    | hsa-mir-188    | 17.14 | 16.33 |
| hsa-miR-590-3p    | hsa-mir-590    | 17.1  | 16.55 |
| hsa-miR-641       | hsa-mir-641    | 16.92 | 18.46 |
| hsa-miR-543       | hsa-mir-543    | 16.92 | 8.16  |
| hsa-miR-199b-5p   | hsa-mir-199b   | 16.83 | 13.88 |
| hsa-miR-3934-5p   | hsa-mir-3934   | 16.7  | 15.01 |
| hsa-miR-98-3p     | hsa-mir-98     | 16.43 | 12.56 |
| hsa-miR-93-3p     | hsa-mir-93     | 16.12 | 20.77 |
| hsa-miR-1908-5p   | hsa-mir-1908   | 16.08 | 8.89  |
| hsa-miR-7641      | hsa-mir-7641-1 | 15.99 | 4.99  |
| hsa-miR-7641      | hsa-mir-7641-2 | 15.99 | 4.99  |
| hsa-miR-486-5p    | hsa-mir-486-2  | 15.59 | 10.43 |
| hsa-miR-10b-3p    | hsa-mir-10b    | 15.32 | 19.45 |
| hsa-miR-191-3p    | hsa-mir-191    | 15.19 | 11.84 |
| hsa-miR-486-5p    | hsa-mir-486-1  | 15.19 | 9.89  |
| hsa-miR-320d      | hsa-mir-320d-1 | 14.88 | 17.32 |
| hsa-miR-320d      | hsa-mir-320d-2 | 14.88 | 17.32 |
| hsa-miR-212-5p    | hsa-mir-212    | 14.83 | 12.7  |
| hsa-miR-181b-3p   | hsa-mir-181b-1 | 14.66 | 8.25  |
| hsa-miR-651-5p    | hsa-mir-651    | 14.57 | 11.75 |
| hsa-miR-889-3p    | hsa-mir-889    | 14.39 | 6.39  |
| hsa-miR-769-3p    | hsa-mir-769    | 13.77 | 9.39  |
| hsa-miR-577       | hsa-mir-577    | 13.77 | 11.02 |
| hsa-miR-3129-3p   | hsa-mir-3129   | 13.55 | 8.84  |
| hsa-miR-29b-1-5p  | hsa-mir-29b-1  | 13.37 | 17.46 |
| hsa-miR-4286      | hsa-mir-4286   | 13.37 | 6.3   |
| hsa-miR-378g      | hsa-mir-378g   | 13.01 | 13.6  |
| hsa-miR-1246      | hsa-mir-1246   | 12.92 | 25.49 |
| hsa-miR-7977      | hsa-mir-7977   | 12.66 | 9.21  |
| hsa-miR-199a-3p   | hsa-mir-199a-2 | 12.48 | 8.43  |
| hsa-miR-199a-3p   | hsa-mir-199a-1 | 12.48 | 8.43  |
| hsa-miR-199b-3p   | hsa-mir-199b   | 12.48 | 8.43  |
| hsa-miR-422a      | hsa-mir-422a   | 12.44 | 14.1  |
| hsa-miR-15a-5p    | hsa-mir-15a    | 12.3  | 14.78 |
| hsa-miR-1285-3p   | hsa-mir-1285-1 | 11.95 | 19.91 |
| hsa-miR-323a-3p   | hsa-mir-323a   | 11.95 | 6.17  |
| hsa-miR-499a-5p   | hsa-mir-499a   | 11.81 | 12.56 |
| hsa-miR-548f-3p   | hsa-mir-548f-5 | 11.77 | 9.75  |
| hsa-miR-548b-5p   | hsa-mir-548b   | 11.59 | 10.97 |
| hsa-miR-3129-5p   | hsa-mir-3129   | 11.59 | 6.71  |

|                 |                |       |       |
|-----------------|----------------|-------|-------|
| hsa-miR-937-3p  | hsa-mir-937    | 11.5  | 11.11 |
| hsa-miR-3200-3p | hsa-mir-3200   | 11.33 | 6.76  |
| hsa-miR-29c-5p  | hsa-mir-29c    | 11.19 | 15.55 |
| hsa-miR-663a    | hsa-mir-663a   | 11.1  | 0.23  |
| hsa-miR-4746-5p | hsa-mir-4746   | 11.01 | 12.52 |
| hsa-miR-1285-3p | hsa-mir-1285-2 | 10.97 | 18.55 |
| hsa-miR-548f-3p | hsa-mir-548f-1 | 10.79 | 7.53  |
| hsa-miR-542-3p  | hsa-mir-542    | 10.7  | 6.67  |
| hsa-miR-548u    | hsa-mir-548u   | 10.57 | 8.34  |
| hsa-miR-143-3p  | hsa-mir-143    | 10.53 | 13.15 |
| hsa-miR-3928-3p | hsa-mir-3928   | 10.44 | 9.57  |
| hsa-miR-4741    | hsa-mir-4741   | 10.26 | 4.85  |
| hsa-miR-16-1-3p | hsa-mir-16-1   | 10.17 | 11.29 |
| hsa-miR-411-5p  | hsa-mir-411    | 10.17 | 10.16 |
| hsa-miR-195-5p  | hsa-mir-195    | 10.13 | 8.43  |
