# Supplementary material for: SUMO1 modification of KHSRP regulates tumorigenesis by preventing the TL-G-Rich miRNA biogenesis
Source: Springer Nature journal article supplement (doi:10.1186/s12943-017-0724-6), 2017-10-11
Supplement: MOESM9 [file 15127168]

**Additional file 9 : Table S3. A subset of miRNAs biogenesis was downregulated in DU145 shRNA-KHSRP stable cell lines**

| miRNA           | precursor     | shCtrl   | shKHSRP  | shKHSRP/shCtrl | downregulation ratio (%)=(shCtrl-shKHSRP)/shCtrl |
|-----------------|---------------|----------|----------|----------------|--------------------------------------------------|
| hsa-let-7i-5p   | hsa-let-7i    | 66743.11 | 49900.27 | 0.747646761    | 25.24%                                           |
| hsa-let-7g-5p   | hsa-let-7g    | 24701.22 | 21522.03 | 0.871294211    | 12.87%                                           |
| hsa-let-7a-5p   | hsa-let-7a-3  | 18978.32 | 15824.84 | 0.833837769    | 16.62%                                           |
| hsa-let-7a-5p   | hsa-let-7a-1  | 18877.54 | 15787.97 | 0.836336196    | 16.37%                                           |
| hsa-let-7a-5p   | hsa-let-7a-2  | 18870.93 | 15783.12 | 0.836372134    | 16.36%                                           |
| hsa-miR-148a-3p | hsa-mir-148a  | 18727.74 | 13999.06 | 0.74750397     | 25.25%                                           |
| hsa-miR-146a-5p | hsa-mir-146a  | 9669.05  | 783.08   | 0.080988308    | 91.90%                                           |
| hsa-miR-24-3p   | hsa-mir-24-1  | 7137.15  | 6087.59  | 0.852944102    | 14.71%                                           |
| hsa-miR-24-3p   | hsa-mir-24-2  | 7119.61  | 6061.88  | 0.851434278    | 14.86%                                           |
| hsa-miR-200b-3p | hsa-mir-200b  | 6133.37  | 3721.53  | 0.606767568    | 39.32%                                           |
| hsa-miR-27b-3p  | hsa-mir-27b   | 5942.88  | 5221.07  | 0.878542054    | 12.15%                                           |
| hsa-miR-99b-5p  | hsa-mir-99b   | 5333.93  | 3796.95  | 0.711848487    | 28.82%                                           |
| hsa-miR-148b-3p | hsa-mir-148b  | 4276.5   | 2527.68  | 0.591062785    | 40.89%                                           |
| hsa-miR-221-3p  | hsa-mir-221   | 3727.02  | 3349.4   | 0.898680447    | 10.13%                                           |
| hsa-let-7b-5p   | hsa-let-7b    | 3690.51  | 2787.94  | 0.755434886    | 24.46%                                           |
| hsa-miR-23a-3p  | hsa-mir-23a   | 3584.54  | 3053.14  | 0.851752247    | 14.82%                                           |
| hsa-miR-182-5p  | hsa-mir-182   | 3407.6   | 2965.39  | 0.870228313    | 12.98%                                           |
| hsa-miR-128-3p  | hsa-mir-128-1 | 3125.71  | 2355.86  | 0.753703958    | 24.63%                                           |
| hsa-miR-26b-5p  | hsa-mir-26b   | 2996.24  | 2486.64  | 0.829920167    | 17.01%                                           |
| hsa-miR-98-5p   | hsa-mir-98    | 2865.31  | 2072.93  | 0.723457497    | 27.65%                                           |
| hsa-let-7d-5p   | hsa-let-7d    | 2625.13  | 2109.62  | 0.803624963    | 19.64%                                           |
| hsa-miR-128-3p  | hsa-mir-128-2 | 2587.24  | 1819.88  | 0.703405946    | 29.66%                                           |
| hsa-miR-183-5p  | hsa-mir-183   | 2481.41  | 1564.25  | 0.630387562    | 36.96%                                           |
| hsa-let-7e-5p   | hsa-let-7e    | 1563.7   | 1185.09  | 0.757875552    | 24.21%                                           |
| hsa-miR-340-5p  | hsa-mir-340   | 1494.64  | 1112.4   | 0.744259487    | 25.57%                                           |
| hsa-miR-200a-3p | hsa-mir-200a  | 1339.1   | 793.92   | 0.592875812    | 40.71%                                           |
| hsa-miR-378i    | hsa-mir-378i  | 1037.67  | 674.2    | 0.649724864    | 35.03%                                           |
| hsa-miR-106b-3p | hsa-mir-106b  | 950.22   | 854.59   | 0.899360148    | 10.06%                                           |

|                 |                |        |        |             |        |
|-----------------|----------------|--------|--------|-------------|--------|
| hsa-miR-92b-3p  | hsa-mir-92b    | 905.05 | 801.81 | 0.885928954 | 11.41% |
| hsa-let-7c-5p   | hsa-let-7c     | 893.95 | 585.68 | 0.655159685 | 34.48% |
| hsa-miR-31-5p   | hsa-mir-31     | 778.52 | 615.2  | 0.790217335 | 20.98% |
| hsa-miR-21-3p   | hsa-mir-21     | 722.82 | 516.29 | 0.71427188  | 28.57% |
| hsa-miR-99b-3p  | hsa-mir-99b    | 712.3  | 484.19 | 0.679755721 | 32.02% |
| hsa-miR-429     | hsa-mir-429    | 708.17 | 296.99 | 0.419376703 | 58.06% |
| hsa-miR-374b-5p | hsa-mir-374b   | 628.67 | 488.99 | 0.777816661 | 22.22% |
| hsa-miR-200a-5p | hsa-mir-200a   | 621.83 | 429.5  | 0.690703247 | 30.93% |
| hsa-miR-181b-5p | hsa-mir-181b-2 | 608.77 | 483.64 | 0.794454392 | 20.55% |
| hsa-miR-181b-5p | hsa-mir-181b-1 | 578.08 | 459.02 | 0.794042347 | 20.60% |
| hsa-miR-2682-5p | hsa-mir-2682   | 559.07 | 338.8  | 0.606006403 | 39.40% |
| hsa-miR-126-3p  | hsa-mir-126    | 510.62 | 256.81 | 0.502937605 | 49.71% |
| hsa-miR-130b-5p | hsa-mir-130b   | 500.45 | 395.44 | 0.790168848 | 20.98% |
| hsa-miR-769-5p  | hsa-mir-769    | 445.15 | 329.19 | 0.739503538 | 26.05% |
| hsa-miR-146b-5p | hsa-mir-146b   | 428.19 | 216.95 | 0.506667601 | 49.33% |
| hsa-let-7d-3p   | hsa-let-7d     | 419.48 | 369.41 | 0.880637933 | 11.94% |
| hsa-miR-32-5p   | hsa-mir-32     | 375.07 | 266.92 | 0.711653825 | 28.83% |
| hsa-miR-1260b   | hsa-mir-1260b  | 345.05 | 271.86 | 0.787885814 | 21.21% |
| hsa-miR-107     | hsa-mir-107    | 343.09 | 249.78 | 0.728030546 | 27.20% |
| hsa-miR-29b-3p  | hsa-mir-29b-2  | 322.62 | 247.74 | 0.767900316 | 23.21% |
| hsa-miR-29b-3p  | hsa-mir-29b-1  | 322.48 | 247.69 | 0.768078641 | 23.19% |
| hsa-miR-30b-5p  | hsa-mir-30b    | 309.12 | 248.87 | 0.805091874 | 19.49% |
| hsa-miR-197-3p  | hsa-mir-197    | 296.19 | 238.13 | 0.803977177 | 19.60% |
| hsa-miR-100-5p  | hsa-mir-100    | 294.59 | 44.4   | 0.150717947 | 84.93% |
| hsa-miR-330-3p  | hsa-mir-330    | 292.37 | 181.89 | 0.622122653 | 37.79% |
| hsa-miR-1260a   | hsa-mir-1260a  | 285.84 | 231.78 | 0.810873216 | 18.91% |
| hsa-miR-181a-3p | hsa-mir-181a-1 | 251.96 | 167.2  | 0.663597396 | 33.64% |
| hsa-miR-374a-5p | hsa-mir-374a   | 243.47 | 218.58 | 0.897769746 | 10.22% |
| hsa-miR-374a-3p | hsa-mir-374a   | 232.01 | 190.1  | 0.819361234 | 18.06% |
| hsa-miR-7706    | hsa-mir-7706   | 224.51 | 161.76 | 0.720502428 | 27.95% |
| hsa-miR-378c    | hsa-mir-378c   | 196.79 | 162.44 | 0.825448448 | 17.46% |
| hsa-miR-335-3p  | hsa-mir-335    | 167.35 | 130.69 | 0.780938154 | 21.91% |
| hsa-miR-32-3p   | hsa-mir-32     | 153.63 | 132.46 | 0.862201393 | 13.78% |
| hsa-miR-381-3p  | hsa-mir-381    | 137.28 | 114.01 | 0.830492424 | 16.95% |

|                 |                |        |        |             |        |
|-----------------|----------------|--------|--------|-------------|--------|
| hsa-miR-148a-5p | hsa-mir-148a   | 137.24 | 110.97 | 0.808583503 | 19.14% |
| hsa-miR-15b-3p  | hsa-mir-15b    | 109.3  | 97.95  | 0.896157365 | 10.38% |
| hsa-miR-106b-5p | hsa-mir-106b   | 108.63 | 95.28  | 0.877105772 | 12.29% |
| hsa-miR-365a-3p | hsa-mir-365a   | 94.42  | 68.2   | 0.722304596 | 27.77% |
| hsa-miR-365b-3p | hsa-mir-365b   | 94.42  | 68.2   | 0.722304596 | 27.77% |
| hsa-miR-877-5p  | hsa-mir-877    | 90.25  | 52.6   | 0.582825485 | 41.72% |
| hsa-miR-301a-5p | hsa-mir-301a   | 88.74  | 48.93  | 0.551386072 | 44.86% |
| hsa-miR-149-5p  | hsa-mir-149    | 86.65  | 56.1   | 0.647432198 | 35.26% |
| hsa-miR-421     | hsa-mir-421    | 85.36  | 50.84  | 0.595595127 | 40.44% |
| hsa-miR-330-5p  | hsa-mir-330    | 73.64  | 44.44  | 0.603476372 | 39.65% |
| hsa-miR-378d    | hsa-mir-378d-2 | 73.19  | 62.26  | 0.850662659 | 14.93% |
| hsa-miR-378d    | hsa-mir-378d-1 | 71.55  | 60.27  | 0.842348008 | 15.77% |
| hsa-miR-320c    | hsa-mir-320c-1 | 70.48  | 57.05  | 0.809449489 | 19.06% |
| hsa-miR-210-3p  | hsa-mir-210    | 70.31  | 51.65  | 0.734603897 | 26.54% |
| hsa-miR-320c    | hsa-mir-320c-2 | 67.51  | 54.37  | 0.805362169 | 19.46% |
| hsa-miR-4664-3p | hsa-mir-4664   | 66.44  | 54.19  | 0.815623119 | 18.44% |
| hsa-miR-374b-3p | hsa-mir-374b   | 66.18  | 54.74  | 0.827138108 | 17.29% |
| hsa-miR-31-3p   | hsa-mir-31     | 58.31  | 46.8   | 0.802606757 | 19.74% |
| hsa-miR-3613-5p | hsa-mir-3613   | 58.09  | 43.22  | 0.744017903 | 25.60% |
| hsa-miR-10a-3p  | hsa-mir-10a    | 58     | 48.84  | 0.842068966 | 15.79% |
| hsa-miR-148b-5p | hsa-mir-148b   | 56.36  | 45.85  | 0.813520227 | 18.65% |
| hsa-miR-425-3p  | hsa-mir-425    | 54.01  | 40.59  | 0.751527495 | 24.85% |
| hsa-miR-152-3p  | hsa-mir-152    | 50.68  | 42.22  | 0.833070245 | 16.69% |
| hsa-miR-1296-5p | hsa-mir-1296   | 50.54  | 31.74  | 0.628017412 | 37.20% |
| hsa-miR-760     | hsa-mir-760    | 50.41  | 31.47  | 0.624280897 | 37.57% |
| hsa-miR-200b-5p | hsa-mir-200b   | 48.59  | 33.2   | 0.683268162 | 31.67% |
| hsa-miR-92b-5p  | hsa-mir-92b    | 48.41  | 41.63  | 0.859946292 | 14.01% |
| hsa-miR-203a-3p | hsa-mir-203a   | 47.92  | 26.35  | 0.549874791 | 45.01% |
| hsa-miR-181d-5p | hsa-mir-181d   | 47.12  | 39.32  | 0.834465195 | 16.55% |
| hsa-miR-652-3p  | hsa-mir-652    | 43.52  | 30.34  | 0.697150735 | 30.28% |
| hsa-miR-185-3p  | hsa-mir-185    | 41.88  | 35.37  | 0.844555874 | 15.54% |
| hsa-miR-1307-5p | hsa-mir-1307   | 40.59  | 35.96  | 0.885932496 | 11.41% |
| hsa-miR-409-3p  | hsa-mir-409    | 39.62  | 22.36  | 0.564361434 | 43.56% |
| hsa-miR-450b-5p | hsa-mir-450b   | 37.17  | 21.22  | 0.570890503 | 42.91% |

|                  |                |       |       |             |        |
|------------------|----------------|-------|-------|-------------|--------|
| hsa-miR-1278     | hsa-mir-1278   | 36.11 | 31.34 | 0.867903628 | 13.21% |
| hsa-miR-5100     | hsa-mir-5100   | 34.2  | 29.25 | 0.855263158 | 14.47% |
| hsa-miR-629-5p   | hsa-mir-629    | 31.27 | 13.24 | 0.423409018 | 57.66% |
| hsa-miR-379-5p   | hsa-mir-379    | 30.56 | 18.82 | 0.615837696 | 38.42% |
| hsa-miR-95-3p    | hsa-mir-95     | 30.29 | 19.95 | 0.658633212 | 34.14% |
| hsa-miR-222-5p   | hsa-mir-222    | 29.71 | 21.77 | 0.732749916 | 26.73% |
| hsa-miR-454-5p   | hsa-mir-454    | 29.53 | 24.03 | 0.81374873  | 18.63% |
| hsa-miR-503-5p   | hsa-mir-503    | 27.76 | 24.58 | 0.885446686 | 11.46% |
| hsa-miR-326      | hsa-mir-326    | 25.58 | 16.1  | 0.629397967 | 37.06% |
| hsa-miR-3074-5p  | hsa-mir-3074   | 22.7  | 20.27 | 0.892951542 | 10.70% |
| hsa-miR-450a-5p  | hsa-mir-450a-1 | 22.03 | 12.7  | 0.576486609 | 42.35% |
| hsa-miR-450a-5p  | hsa-mir-450a-2 | 21.98 | 12.7  | 0.577797998 | 42.22% |
| hsa-miR-200c-3p  | hsa-mir-200c   | 21.9  | 8.48  | 0.387214612 | 61.28% |
| hsa-miR-128-1-5p | hsa-mir-128-1  | 21.67 | 17.73 | 0.818181818 | 18.18% |
| hsa-miR-654-3p   | hsa-mir-654    | 20.96 | 12.7  | 0.605916031 | 39.41% |
| hsa-miR-324-5p   | hsa-mir-324    | 20.21 | 15.96 | 0.789708065 | 21.03% |
| hsa-miR-2277-5p  | hsa-mir-2277   | 19.72 | 17.6  | 0.892494929 | 10.75% |
| hsa-miR-122-5p   | hsa-mir-122    | 19.1  | 16.1  | 0.842931937 | 15.71% |
| hsa-miR-4473     | hsa-mir-4473   | 18.79 | 16.33 | 0.869079297 | 13.09% |
| hsa-miR-301b-3p  | hsa-mir-301b   | 17.81 | 10.88 | 0.610892757 | 38.91% |
| hsa-miR-215-5p   | hsa-mir-215    | 17.77 | 15.65 | 0.880697805 | 11.93% |
| hsa-miR-151b     | hsa-mir-151b   | 17.77 | 12.2  | 0.686550366 | 31.34% |
| hsa-miR-2682-3p  | hsa-mir-2682   | 17.41 | 8.48  | 0.487076393 | 51.29% |
| hsa-miR-543      | hsa-mir-543    | 16.92 | 8.16  | 0.482269504 | 51.77% |
| hsa-miR-199b-5p  | hsa-mir-199b   | 16.83 | 13.88 | 0.824717766 | 17.53% |
| hsa-miR-3934-5p  | hsa-mir-3934   | 16.7  | 15.01 | 0.898802395 | 10.12% |
| hsa-miR-98-3p    | hsa-mir-98     | 16.43 | 12.56 | 0.764455265 | 23.55% |
| hsa-miR-1908-5p  | hsa-mir-1908   | 16.08 | 8.89  | 0.552860697 | 44.71% |
| hsa-miR-7641     | hsa-mir-7641-1 | 15.99 | 4.99  | 0.312070044 | 68.79% |
| hsa-miR-7641     | hsa-mir-7641-2 | 15.99 | 4.99  | 0.312070044 | 68.79% |
| hsa-miR-486-5p   | hsa-mir-486-2  | 15.59 | 10.43 | 0.669018602 | 33.10% |
| hsa-miR-191-3p   | hsa-mir-191    | 15.19 | 11.84 | 0.779460171 | 22.05% |
| hsa-miR-486-5p   | hsa-mir-486-1  | 15.19 | 9.89  | 0.651086241 | 34.89% |
| hsa-miR-212-5p   | hsa-mir-212    | 14.83 | 12.7  | 0.856372218 | 14.36% |

|                 |                |       |       |             |        |
|-----------------|----------------|-------|-------|-------------|--------|
| hsa-miR-181b-3p | hsa-mir-181b-1 | 14.66 | 8.25  | 0.562755798 | 43.72% |
| hsa-miR-651-5p  | hsa-mir-651    | 14.57 | 11.75 | 0.806451613 | 19.35% |
| hsa-miR-889-3p  | hsa-mir-889    | 14.39 | 6.39  | 0.444058374 | 55.59% |
| hsa-miR-577     | hsa-mir-577    | 13.77 | 11.02 | 0.800290487 | 19.97% |
| hsa-miR-769-3p  | hsa-mir-769    | 13.77 | 9.39  | 0.681917211 | 31.81% |
| hsa-miR-3129-3p | hsa-mir-3129   | 13.55 | 8.84  | 0.652398524 | 34.76% |
| hsa-miR-4286    | hsa-mir-4286   | 13.37 | 6.3   | 0.471204188 | 52.88% |
| hsa-miR-7977    | hsa-mir-7977   | 12.66 | 9.21  | 0.727488152 | 27.25% |
| hsa-miR-199a-3p | hsa-mir-199a-2 | 12.48 | 8.43  | 0.675480769 | 32.45% |
| hsa-miR-199a-3p | hsa-mir-199a-1 | 12.48 | 8.43  | 0.675480769 | 32.45% |
| hsa-miR-199b-3p | hsa-mir-199b   | 12.48 | 8.43  | 0.675480769 | 32.45% |
| hsa-miR-323a-3p | hsa-mir-323a   | 11.95 | 6.17  | 0.516317992 | 48.37% |
| hsa-miR-548f-3p | hsa-mir-548f-5 | 11.77 | 9.75  | 0.82837723  | 17.16% |
| hsa-miR-3129-5p | hsa-mir-3129   | 11.59 | 6.71  | 0.578947368 | 42.11% |
| hsa-miR-3200-3p | hsa-mir-3200   | 11.33 | 6.76  | 0.596646072 | 40.34% |
| hsa-miR-663a    | hsa-mir-663a   | 11.1  | 0.23  | 0.020720721 | 97.93% |
| hsa-miR-548f-3p | hsa-mir-548f-1 | 10.79 | 7.53  | 0.697868397 | 30.21% |
| hsa-miR-542-3p  | hsa-mir-542    | 10.7  | 6.67  | 0.623364486 | 37.66% |
| hsa-miR-548u    | hsa-mir-548u   | 10.57 | 8.34  | 0.789025544 | 21.10% |
| hsa-miR-4741    | hsa-mir-4741   | 10.26 | 4.85  | 0.472709552 | 52.73% |
| hsa-miR-195-5p  | hsa-mir-195    | 10.13 | 8.43  | 0.832181639 | 16.78% |
