# Supplementary material for: SUMO1 modification of KHSRP regulates tumorigenesis by preventing the TL-G-Rich miRNA biogenesis
Source: Springer Nature journal article supplement (doi:10.1186/s12943-017-0724-6), 2017-10-11
Supplement: MOESM10 [file 15127168]

| Additional file 10: Table S4. KHSRP-K87R promoted a subset of miRNAs biogenesis in DU145 stable cell lines |               |          |            |          |                                       | Gs in the terminal loop |      |     |    |   |      |     |      |     |
|------------------------------------------------------------------------------------------------------------|---------------|----------|------------|----------|---------------------------------------|-------------------------|------|-----|----|---|------|-----|------|-----|
|                                                                                                            |               |          |            |          |                                       | GGGGG                   | GGGG | GGG | GG | G | GUGG | GUG | GGAG | GAG |
| miRNA                                                                                                      | precursor     | KHSRP-WT | KHSRP-K87R | K87R/WT  | upregulation ratio(%)= (K87R-WT) / WT |                         |      |     |    |   |      |     |      |     |
| hsa-let-7i-5p                                                                                              | hsa-let-7i    | 44505.83 | 62924.09   | 1.413839 | 41.38%                                |                         |      | √   | √  | √ |      | √   | √    |     |
| hsa-let-7g-5p                                                                                              | hsa-let-7g    | 21052.52 | 26778.8    | 1.272    | 27.20%                                |                         |      | √   |    |   |      |     | √    |     |
| hsa-miR-148a-3p                                                                                            | hsa-mir-148a  | 13017.69 | 22059.79   | 1.694601 | 69.46%                                |                         |      |     |    | √ |      |     |      | √   |
| hsa-miR-99b-5p                                                                                             | hsa-mir-99b   | 3903.84  | 4862.12    | 1.245471 | 24.55%                                |                         |      | √   |    | √ |      |     |      |     |
| hsa-miR-148b-3p                                                                                            | hsa-mir-148b  | 2459.28  | 3030.36    | 1.232214 | 23.22%                                |                         |      |     | √  | √ | √    |     |      |     |
| hsa-miR-182-5p                                                                                             | hsa-mir-182   | 2511.88  | 4386.56    | 1.746325 | 74.63%                                |                         |      |     | √  |   |      |     | √    |     |
| hsa-miR-26b-5p                                                                                             | hsa-mir-26b   | 2674.64  | 3243.59    | 1.21272  | 21.27%                                |                         |      |     |    | √ |      | √   |      |     |
| hsa-miR-98-5p                                                                                              | hsa-mir-98    | 1814.85  | 2557.91    | 1.409433 | 40.94%                                |                         | √    | √   | √  | √ |      |     |      | √   |
| hsa-miR-183-5p                                                                                             | hsa-mir-183   | 1579.09  | 2223.77    | 1.40826  | 40.83%                                |                         |      |     |    | √ |      | √   |      |     |
| hsa-let-7e-5p                                                                                              | hsa-let-7e    | 1064.01  | 1267.05    | 1.190825 | 19.08%                                |                         |      |     | √  | √ |      |     | √    |     |
| hsa-miR-21-3p                                                                                              | hsa-mir-21    | 656.89   | 858.83     | 1.307418 | 30.74%                                |                         |      |     | √  | √ |      |     |      |     |
| hsa-miR-32-5p                                                                                              | hsa-mir-32    | 277.61   | 429.18     | 1.545982 | 54.60%                                |                         |      |     | √  | √ | √    |     |      |     |
| hsa-miR-107                                                                                                | hsa-mir-107   | 282.74   | 321.13     | 1.135778 | 13.58%                                |                         |      |     | √  | √ |      |     | √    |     |
| hsa-miR-29b-3p                                                                                             | hsa-mir-29b-2 | 244.97   | 355.95     | 1.453035 | 45.30%                                |                         |      |     |    | √ |      |     |      | *   |
| hsa-miR-29b-3p                                                                                             | hsa-mir-29b-1 | 244.97   | 355.77     | 1.4523   | 45.23%                                |                         |      |     |    | √ |      | √   |      |     |
| hsa-miR-30b-5p                                                                                             | hsa-mir-30b   | 291.17   | 349.47     | 1.200227 | 20.02%                                |                         |      |     | √  | √ |      |     |      |     |
| hsa-miR-197-3p                                                                                             | hsa-mir-197   | 256.49   | 308.92     | 1.204413 | 20.44%                                |                         |      |     |    | √ |      |     |      | √   |
| hsa-miR-330-3p                                                                                             | hsa-mir-330   | 127.8    | 197.99     | 1.549218 | 54.92%                                |                         |      |     |    | √ |      |     |      |     |
| hsa-miR-7706                                                                                               | hsa-mir-7706  | 155.76   | 250.41     | 1.607666 | 60.77%                                |                         |      |     | √  | √ |      |     | √    | √   |
| hsa-miR-32-3p                                                                                              | hsa-mir-32    | 129.9    | 144.75     | 1.114319 | 11.43%                                |                         |      |     |    | √ |      | √   |      |     |
| hsa-miR-381-3p                                                                                             | hsa-mir-381   | 89.1     | 129.85     | 1.457351 | 45.74%                                |                         |      |     | √  | √ |      |     |      |     |
| hsa-miR-365a-3p                                                                                            | hsa-mir-365a  | 40.69    | 83.38      | 2.049152 | 104.92%                               |                         |      |     |    |   |      |     |      | *   |
| hsa-miR-365b-3p                                                                                            | hsa-mir-365b  | 40.75    | 83.38      | 2.046135 | 104.61%                               |                         |      |     |    | √ |      |     |      |     |
| hsa-miR-877-5p                                                                                             | hsa-mir-877   | 39.26    | 76.09      | 1.938105 | 93.81%                                | √                       |      | √   | √  | √ |      | √   |      |     |

|                 |                |       |       |          |        |  |   |   |   |   |   |   |   |
|-----------------|----------------|-------|-------|----------|--------|--|---|---|---|---|---|---|---|
| hsa-miR-301a-5p | hsa-mir-301a   | 48.85 | 59.56 | 1.219243 | 21.92% |  |   |   | ✓ |   |   |   |   |
| hsa-miR-149-5p  | hsa-mir-149    | 57.84 | 68.02 | 1.176003 | 17.60% |  | ✓ | ✓ | ✓ |   | ✓ | ✓ |   |
| hsa-miR-421     | hsa-mir-421    | 43.39 | 54.99 | 1.267343 | 26.73% |  |   |   | ✓ |   |   |   | * |
| hsa-miR-330-5p  | hsa-mir-330    | 41.63 | 54.64 | 1.312515 | 31.25% |  |   |   | ✓ |   |   |   |   |
| hsa-miR-4664-3p | hsa-mir-4664   | 53.59 | 83.18 | 1.552155 | 55.22% |  |   |   | ✓ |   |   |   | ✓ |
| hsa-miR-374b-3p | hsa-mir-374b   | 65.23 | 72.68 | 1.114211 | 11.42% |  |   |   | ✓ |   |   |   | * |
| hsa-miR-31-3p   | hsa-mir-31     | 36.5  | 67.03 | 1.836438 | 83.64% |  | ✓ |   | ✓ |   |   |   |   |
| hsa-miR-425-3p  | hsa-mir-425    | 47.47 | 58.8  | 1.238677 | 23.87% |  | ✓ |   | ✓ |   |   |   | ✓ |
| hsa-miR-760     | hsa-mir-760    | 25.03 | 40.38 | 1.613264 | 61.33% |  |   |   | ✓ |   |   |   | * |
| hsa-miR-92b-5p  | hsa-mir-92b    | 42.62 | 56.01 | 1.314172 | 31.42% |  |   |   | ✓ |   |   |   |   |
| hsa-miR-629-5p  | hsa-mir-629    | 12.41 | 18.54 | 1.493956 | 49.40% |  |   | ✓ | ✓ | ✓ |   | ✓ |   |
| hsa-miR-301b-3p | hsa-mir-301b   | 7.83  | 11.14 | 1.422733 | 42.27% |  |   |   | ✓ |   | ✓ |   | ✓ |
| hsa-miR-2682-3p | hsa-mir-2682   | 8.99  | 10.64 | 1.183537 | 18.35% |  | ✓ |   |   |   |   |   |   |
| hsa-miR-199b-5p | hsa-mir-199b   | 8.05  | 16.06 | 1.995031 | 99.50% |  |   | ✓ | ✓ |   |   |   |   |
| hsa-miR-486-5p  | hsa-mir-486-2  | 10.53 | 12.86 | 1.221273 | 22.13% |  | ✓ |   | ✓ |   |   |   | ✓ |
| hsa-miR-486-5p  | hsa-mir-486-1  | 10.2  | 12.01 | 1.177451 | 17.75% |  |   |   | ✓ |   |   |   |   |
| hsa-miR-212-5p  | hsa-mir-212    | 10.7  | 14.64 | 1.368224 | 36.82% |  | ✓ |   | ✓ |   |   |   |   |
| hsa-miR-651-5p  | hsa-mir-651    | 13.89 | 20.17 | 1.452124 | 45.21% |  |   |   | ✓ |   |   |   | * |
| hsa-miR-769-3p  | hsa-mir-769    | 9.54  | 14.08 | 1.475891 | 47.59% |  |   |   | ✓ |   | ✓ |   | ✓ |
| hsa-miR-3129-3p | hsa-mir-3129   | 8.6   | 12.36 | 1.437209 | 43.72% |  |   |   | ✓ |   |   |   |   |
| hsa-miR-323a-3p | hsa-mir-323a   | 5.29  | 5.95  | 1.124764 | 12.48% |  |   | ✓ | ✓ |   |   |   |   |
| hsa-miR-548f-3p | hsa-mir-548f-5 | 8.77  | 10.38 | 1.18358  | 18.36% |  | ✓ |   | ✓ |   |   |   |   |
| hsa-miR-3129-5p | hsa-mir-3129   | 7.11  | 9.13  | 1.284107 | 28.41% |  |   |   | ✓ |   |   |   |   |
| hsa-miR-3200-3p | hsa-mir-3200   | 4.96  | 9.01  | 1.816532 | 81.65% |  |   |   | ✓ |   | ✓ |   |   |
| hsa-miR-548f-3p | hsa-mir-548f-1 | 7.39  | 8.25  | 1.116373 | 11.64% |  |   |   | ✓ |   |   |   |   |
| hsa-miR-542-3p  | hsa-mir-542    | 4.8   | 5.66  | 1.179167 | 17.92% |  |   |   | ✓ |   | ✓ |   |   |
| hsa-miR-4741    | hsa-mir-4741   | 5.46  | 7.46  | 1.3663   | 36.63% |  |   | ✓ |   |   |   |   |   |

Note: \* represents a miRNA that harbors only one single G or none G in its precursor terminal loop.
