# Supplementary material for: SUMO1 modification of KHSRP regulates tumorigenesis by preventing the TL-G-Rich miRNA biogenesis
Source: Springer Nature journal article supplement (doi:10.1186/s12943-017-0724-6), 2017-10-11

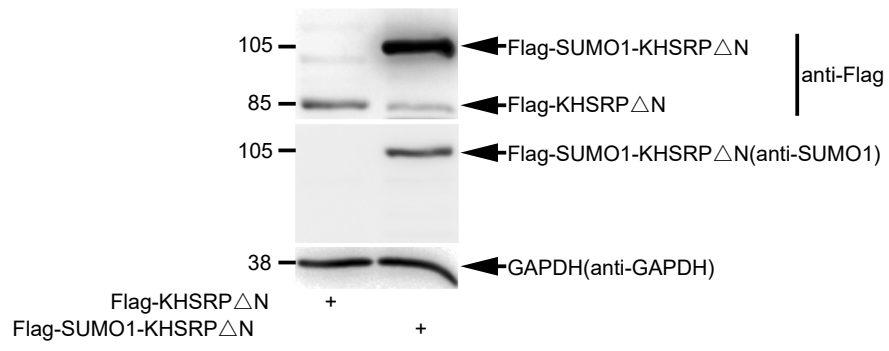

Supplement: MOESM12 [file 15127168]
