# Supplementary material for: SUMO1 modification of KHSRP regulates tumorigenesis by preventing the TL-G-Rich miRNA biogenesis
Source: Springer Nature journal article supplement (doi:10.1186/s12943-017-0724-6), 2017-10-11
Supplement: MOESM16 [file 15127168]

**Additional file 16: Table S5. All primers or oligonucleotides used in this study.**

**1) Primers used for construction of HA-KHSRP and Flag-KHSRP**

| hKSRP              | Primer  | sequences (5'-3')                 |
|--------------------|---------|-----------------------------------|
| HA-KHSRP aa 68-712 | Forward | ccggaattcggaaatccgcaaggacgcttccg  |
|                    | Reverse | gctctagatcattgagcctgctgctccctgc   |
| HA-KHSRP           | Forward | ccggaattcatgctggactacagcacggaggac |
|                    | Reverse | gctctagatcattgagcctgctgctccctgc   |
| Flag- KHSRP        | Forward | cggaattcatgctggactacagcacggaggac  |
|                    | Reverse | ccgctcagtcattgagcctgctgctccctgc   |

**2) Primers used for construction of Flag-SUMO1-KSRP aa 68-712**

| SUMO1-KHSRP  | Primer  | sequences (5'-3')                |
|--------------|---------|----------------------------------|
| First cycle  | Forward | acgcgtcgacggaatccgcaaggacgcttccg |
|              | Reverse | ccgctcagtcattgagcctgctgctccctgc  |
| Second cycle | Forward | cccaagcttctgaccaggaggcaaaccttc   |
|              | Reverse | acgcgtcgaccctgtttgtcctgataaactc  |

**3) Primers for point mutation and NLS deletion mutation of KSRP**

| h KSRP        | Primer  | sequence (5'-3')             |
|---------------|---------|------------------------------|
| KHSRP K87R    | Forward | agaattggaggcgtgctccacga      |
|               | Reverse | ggctgcaatctggcggcccctgc      |
| KHSRP K359R   | Forward | aggcaagatgacgggacaggcccg     |
|               | Reverse | gaactgtatccgcagccagcatca     |
| KHSRP K628R   | Forward | aggatcgccagcagccccagcagc     |
|               | Reverse | ttgtaatactctccaggccta        |
| KHSRP K244R   | Forward | aggccggcctgctcattggcaagg     |
|               | Reverse | gcccgcgggatcatgatctcctgc     |
| KHSRP K251R   | Forward | agggcggggagaccattaagcagc     |
|               | Reverse | gccaatgaccaggccgccttgc       |
| KHSRP K435R   | Forward | aggtgtgggctgctcagccgag       |
|               | Reverse | gtgagtgggatggagaaggtcatc     |
| KHSRP K473R   | Forward | aggtgttcacatccgggttcac       |
|               | Reverse | gaagttgggtccccgttgggtggc     |
| KHSRP K494R   | Forward | aggatcgaggctctctgccag        |
|               | Reverse | ttcctgataagctgctggcgtgg      |
| KHSRP NLS Del | Forward | ctgcttcccaggagactcaatcagttc  |
|               | Reverse | ttgcccccaaaacaaatcaggagtgctg |
| KHSRP S193A   | Forward | gccttgacaggagccccagaatctg    |
|               | Reverse | cacactgcgctcgggtagccaccgc    |
| KHSRP S193D   | Forward | gacttgacaggagccccagaatctg    |
|               | Reverse | cacactgcgctcgggtagccaccgc    |

**3) Primers used for constructions of lentiviral KHSRP expression, shRNAs for KHSRP, shRNA for**

## SENP1

|                    | Primer  | Sequence (5'-3')                                                |
|--------------------|---------|-----------------------------------------------------------------|
| lentiviral-HA-KSRP | Forward | gctctagagccaccatgtatccttacgacgtccagactatgcaatgctggactacagcacggg |
|                    | Reverse | cggaattctcattgagcctgctgctgcctgc                                 |
| KHSRP -shRNA       | Forward | ccggctctgaggataaagcaattcattctcgagaatgaattgctttatcctcagttttg     |
|                    | Reverse | aattcaaaaactgaggataaagcaattcattctcgagaatgaattgctttatcctcaga     |
| SENP1-shRNA -1     | Forward | ccggtagaatactctgcaataccctcgagggtattgcaagagtattctttttg           |
|                    | Reverse | aattcaaaaaagaatactctgcaataccctcgagggtattgcaagagtattcta          |
| Ubc9-shRNA         | Forward | ccggctctacacgattactgccaactcgagttggcagtaaatcgttaggcttttg         |
|                    | Reverse | aattcaaaaagcctacacgattactgccaactcgagttggcagtaaatcgttaggca       |

## 4) Primers for qRT-PCR

| miRNAs         | Primer    | sequence (5'-3')                                 |
|----------------|-----------|--------------------------------------------------|
| GAPDH          | Forward   | atgaggccaccaccctgtt                              |
|                | Reverse   | ctcaaggcctcctgggcta                              |
| U6             | Forward   | cgcttcggcagcacatatac                             |
|                | Reverse   | agggccatgctaattctct                              |
| miR-98-5p      | RT-primer | gtcgtatccagtcagggtccgaggtattcgactggatacgacaacaat |
|                | Forward   | gcctgtgaggtagtagttgta                            |
| let-7i-5p      | RT-primer | gtcgtatccagtcagggtccgaggtattcgactggatacgacaacagc |
|                | Forward   | gcctgtgaggtagtagttg                              |
| miR-183-5p     | RT-primer | gtcgtatccagtcagggtccgaggtattcgactggatacgacagtgaa |
|                | Forward   | gcctgtatggcactgtagaat                            |
| miR-182-5p     | RT-primer | gtcgtatccagtcagggtccgaggtattcgactggatacgacagtg   |
|                | Forward   | gcctgttggcaatgtagaactc                           |
| pri-let-7a-1   | Forward   | ttcaccattaccctggat                               |
|                | Reverse   | ccaggccataaacaatgct                              |
| pri-let-7a-3   | Forward   | ttgggtttcctgcagg                                 |
|                | Reverse   | aactgagaccagagaga                                |
| RT-let-7a      | Forward   | gtcgtatccagtcagggtccgaggtattcgactggatacgacaactat |
| RT-U6          | Reverse   | agggccatgctaattctct                              |
| qRT-let-7a     | Forward   | gcctgtgaggtagtagttg                              |
| qRT-Rev primer | Reverse   | gtcagggtccgaggt                                  |
